# Supplementary material for: Hydrazine-assisted formation of ultrathin MoS2 nanosheets for enhancing their co-catalytic activity in photocatalytic hydrogen evolution
Source: Royal Society of Chemistry journal article supplement (doi:10.1039/c7ta00832e), 2017-01-01
Supplement: c7ta00832e1.pdf [file c7ta00832e1.pdf]

# Electronic Supplementary Information

Hydrazine-assisted formation of ultrathin MoS<sub>2</sub> nanosheets for enhancing their co-catalytic activity in photocatalytic hydrogen evolution

*D. Amaranatha Reddy, Hanbit Park, Sangyeob Hong, D. Praveen Kumar and Tae Kyu Kim\**

*Department of Chemistry and Chemical Institute for Functional Materials, Pusan National  
University, Busan 46241, Republic of Korea*

\* Corresponding Author. E-mail) [tkkim@pusan.ac.kr](mailto:tkkim@pusan.ac.kr)

# 1. EXPERIMENTAL SECTION

## *1.1 Reagents:*

$\text{Cd}(\text{CH}_3\text{COO})_2 \cdot 2\text{H}_2\text{O}$  (98%),  $\text{Na}_2\text{MoO}_4 \cdot 2\text{H}_2\text{O}$  (99%),  $\text{CH}_4\text{N}_2\text{S}$  (99 %) and lactic acid were obtained from DAEJUNG Chemicals, South Korea. The bulk  $\text{MoS}_2$  (99 %),  $\text{C}_2\text{H}_5\text{NS}$  (98 %), Hydrazine were obtained from Alfa Aesar, South Korea.

## *1.2 Synthesis of T-MoS<sub>2</sub> nanosheets:*

Thick  $\text{MoS}_2$  (T- $\text{MoS}_2$ ) nanosheets were synthesized via a hydrothermal method. A typical synthetic process involved dissolving  $\text{Na}_2\text{MoO}_4$ , (0.3 g) and  $\text{C}_2\text{H}_5\text{NS}$  (0.6 g) at the required stoichiometry into de-ionized (DI) water in a Teflon-lined autoclave. After stirring for 3 h, the autoclave was placed inside a furnace and heated at 200 °C for 24 h. After completion of the reaction, the autoclave was air-cooled to room temperature. The products were collected and washed several times with DI water to remove any impurities and then finally dried at 100 °C for 6 h to obtain the final products. The black precipitates were the T- $\text{MoS}_2$  nanosheets, which were synthesized with yield of 0.15 g.

## *1.3 Synthesis of CdS nanorods*

CdS nanorods were synthesized via a hydrothermal method. A typical synthetic process involved dissolving  $\text{Cd}(\text{CH}_3\text{COO})_2 \cdot 2\text{H}_2\text{O}$  (3.2 mmol),  $\text{CH}_4\text{N}_2\text{S}$  (16 mmol) at the required stoichiometry into 60 mL ethylenediamine. After stirring for 2 h, the solution was transformed to 80 ml Teflon-lined autoclave and was placed inside a furnace and heated at 160 °C for 48 h. After completion of the reaction, the autoclave was air-cooled to room temperature. The products were

collected and washed several times with DI water to remove any impurities and then finally dried at 100 °C for 6 h to obtain the final products with yield of 0.958 g.

#### ***1.4 Synthesis of CdS/T--MoS<sub>2</sub> nanocomposites***

To synthesize CdS/T-MoS<sub>2</sub> nanocomposites, the synthesized CdS and desired wt.% of T-MoS<sub>2</sub> (2, 4, 6, 8 and 10) were dispersed in 20 mL of DMF in a separate beaker and both of the samples were stirred for 30 minutes. After stirring, T-MoS<sub>2</sub> suspension was mixed with the CdS solution. The mixture was vigorously stirred for 24 h to obtain a homogeneous suspension. After completion of the reaction, the products were collected and washed several times with DI water to remove the impurities and finally dried at 100 °C for 6 h to obtain the final products. CdS/T-MoS<sub>2</sub> with different T-MoS<sub>2</sub> contents was prepared following the same method with different wt.% of T-MoS<sub>2</sub> as the reactant.

#### ***1.5 Synthesis of ultrathin MoS<sub>2</sub>/CdS nanocomposite:***

To synthesize CdS/UT-MoS<sub>2</sub> nanocomposites, at first the desired wt.% of T-MoS<sub>2</sub> (2, 4, 6, 8 and 10) were dispersed in 30 mL of DMF and ultra sonic for 3 h. After sonication for 3 h, the suspension was all black. Then, as-prepared CdS nanorods (50 mg) quickly poured into the former black dispersion. The mixture was subjected to ultrasonic treatment for 1 h followed by overnight stirring to achieve close interfacial contact between UT-MoS<sub>2</sub> and CdS nanorods. The UT-MoS<sub>2</sub>/CdS nanocomposite was collected after removal of DMF by vacuum distillation. The final products were collected and washed several times with ethanol to remove the impurities and finally heated in air at 80 °C for 10 h to obtain the final products.

#### ***1.6 Synthesis of hydrazine assisted liquid exfoliation formation of ultrathin- MoS<sub>2</sub> (HUT-MoS<sub>2</sub>)/CdS nanocomposite***

To synthesize CdS/HUT-MoS<sub>2</sub> nanocomposites, at first the desired wt.% of T-MoS<sub>2</sub> (2, 4, 6, and 10) were dispersed in 30 mL of DMF and desired volume of hydrazine (0.5, 1, 1.5 and 2 vol.%) and ultra sonic for 3 h. Then, as-prepared CdS nanorods (50 mg) quickly poured into the former dispersion solution. Then the mixture was subjected to ultrasonic treatment for 1 h followed by overnight stirring to achieve close interfacial contact between HUT-MoS<sub>2</sub> and CdS nanorods. The HUT-MoS<sub>2</sub>/CdS nanocomposite was collected after removal of DMF by vacuum distillation. The final products were collected and washed several times with ethanol to remove the impurities and finally heated in air at 80 °C for 10 h to obtain the final products.

### ***1.7 Synthesis of bulk- MoS<sub>2</sub>/CdS nanocomposites***

The commercial bulk MoS<sub>2</sub> nanostructures was purchased from Alfa Aesar, South Korea and used without further purification. To synthesize CdS/B-MoS<sub>2</sub> nanocomposites, the synthesized CdS and desired wt.% of C-MoS<sub>2</sub> (2, 4, 6, 8 and 10) were dispersed in 20 mL of DMF in a separate beaker and both of the samples were stirred for 30 minutes. After stirring, B-MoS<sub>2</sub> suspension was mixed with the CdS solution. The mixture was vigorously stirred for 24 h to obtain a homogeneous suspension. After completion of the reaction, the products were collected and washed several times with DI water to remove the impurities and finally heated in air at 100 °C for 6 h to obtain the final products. CdS/B-MoS<sub>2</sub> with different B-MoS<sub>2</sub> contents was prepared following the same method with different wt.% of B-MoS<sub>2</sub> as the reactant.

### ***1.8 Photo-deposition of Pt nanoparticles on CdS nanorods***

The Pt-loaded hybrid particles were prepared using 150-W xenon-arc lamp by photo deposition technique. In detail, 50 mg of above synthesized CdS nanorods are suspended in mixed solvent 20 mL of a mixed solvent H<sub>2</sub>O/lactic acid (80:20 v/v)). Then, required stoichiometric



amount of  $\text{H}_2\text{PtCl}_6 \cdot 6\text{H}_2\text{O}$  (1, 2, 3, 4 and 5 wt% of Pt) were added to the above suspension. The solution was then thoroughly degassed and bubbled with Ar for 30 min to remove the air inside and finally irradiated by a 150 W Xe-arc lamp for 2 h. After irradiation, the filtered Pt-loaded CdS nanocomposites were washed with distilled water and ethanol to remove the unnecessary impurities and dried at 80 °C for 10 h to obtain the final products.

## 2. Characterization

The morphologies and average particle sizes were measured using a Hitachi S-4800 field emission scanning electron microscope (FESEM) equipped with an Inca 400 energy-dispersive spectrometer from Oxford Instruments. The microstructure properties were measured using a JEOL JEM-2100F transmission electron microscope (TEM) with an accelerating voltage of 200 kV. The atomic force microscopy (AFM) images were obtained by using XE-100 atomic force microscopy. Raman spectra were obtained on an Xper-Ram 200 (Nano Base, Korea) micro Raman spectrometer with a solid-state laser (excitation at 532 nm) at room temperature. Phase determination of the as-prepared powders was performed using a Bruker D8 Advance X-ray diffractometer with a  $\text{Cu K}\alpha$  X-ray source. X-ray photoelectron spectroscopy (XPS) was performed using a monochromated  $\text{Al K}\alpha$  X-ray source ( $h\nu = 1486.6$  eV) at an energy of 15 kV/150 W. The nitrogen adsorption–desorption isotherm measurements for the samples were carried out at 77.35 K using a Tristar 3000 Micromeritics instrument to measure the surface area. The optical absorption measurements were performed using a Shimadzu UV-1800 double-beam spectrophotometer. Photoluminescence (PL) measurements were performed at room temperature using Hitachi F-7000 fluorescence spectrophotometer with an excitation wavelength of 380 nm.

## **2.1 Photocatalytic hydrogen Production**

The photocatalytic hydrogen evolution experiments were performed in a 150 ml quartz beaker at ambient temperature and atmospheric pressure. The openings of the flask were sealed with silicone rubber septum. A solar simulator equipped with an AM 1.5G filter and 150 W Xe lamp (Abet Technologies) was used as the light source. The output light intensity was adjusted to 1 sun (100 W/m<sup>2</sup>) using 15151 low-cost calibrated Si reference cell (ABET technologies). Before irradiation, the system was evacuation and bubbled with Ar for 30 min to remove the air inside. The hydrogen gas evolved was determined using an off-line gas chromatograph (Young Lin Autochro-3000, model 4900) equipped with thermal conductivity detector and a 5 Å molecular sieve column. The 100 µL of produced hydrogen gas in headspace of reactor was collected and injected into the GC and calculated by a calibration plot to 5 % standard gas of hydrogen.

The apparent quantum efficiency (QE) was measured according to the equation below

$$QE = \frac{\text{nuber of reacted electrons}}{\text{number of incident photons}} \times 100 \%$$
$$= \frac{\text{number of evolved H}_2\text{molecules} \times 2}{\text{number of incident photons}} \times 100\%$$

Here the QE was measured under the same photocatalytic hydrogen evolution experimental conditions except the irradiation source, here 150 W Xe lamp with 425 nm band pass filter were used as light sources, instead of the solar simulator. The output light intensity was measured using 15151 low-cost calibrated Si reference cell (ABET technologies). The liquid level is ~16 cm far from the window of lamp and the illuminated area is 21.24 cm<sup>2</sup>.

## **2.2 Photo-electrochemical measurements**

Photo-electrochemical measurements were performed in a three-electrode system using a CHI 617B electrochemical workstation. A solar simulator equipped with an AM 1.5G filter and 150 W Xe lamp (Abet Technologies) was used as the irradiation source to produce monochromatic illuminating light. The output light intensity was adjusted to 1 sun ( $100 \text{ W/m}^2$ ) using 15151 low-cost calibrated Si reference cell (ABET technologies). The reference and counter electrodes were Ag/AgCl and platinum wire, respectively, and 0.5 M  $\text{Na}_2\text{SO}_4$  aqueous solution served as the electrolyte. The measured pH value is 6.72. To prepare the working electrode, the as-synthesized 10 mg of CdS, CdS/T-MoS<sub>2</sub>, CdS/UT-MoS<sub>2</sub> and CdS/HUT-MoS<sub>2</sub> nanocomposites were first dispersed into ethanol (450  $\mu\text{l}$ ) and 50  $\mu\text{l}$  Nafion mixtures using soft ultrasonic stirring to obtain a uniform suspension. The solution containing the catalyst (30  $\mu\text{l}$ ) was dropped onto the pretreated indium–tin oxide (ITO) conductor glass substrate, which was then dried in an oven at 80 °C for 3 h. Photo-responses were measured at 0.0 V during on-off cycling of the solar simulator. Electrochemical impedance spectroscopy (EIS) was carried out at open-circuit potential over the frequency range of  $10^5$  and  $10^{-1}$  Hz with an AC voltage magnitude of 5 mV. Moreover, to evaluate the flat-band potential ( $V_{\text{FB}}$ ) of the CdS, B-MoS<sub>2</sub>, T-MoS<sub>2</sub>, UT-MoS<sub>2</sub> and HUT-MoS<sub>2</sub> Mott–Schottky plots at a frequency of 1 kHz were measured using a standard potentiostat equipped with an impedance spectra analyzer in the same electrochemical configuration and electrolyte under the dark condition. The measured potentials versus Ag/AgCl were converted to the normal hydrogen electrode (NHE) scale by  $E_{\text{NHE}} = E_{\text{Ag/AgCl}} + 0.197$ . The cyclic voltammograms (CV) were measured with a scanning rate of 10 mV/s using whereas the electrolyte was consisting of 0.1M  $\text{Na}_2\text{SO}_4$  aqueous solution with 1mM  $\text{K}_3[\text{Fe}(\text{CN})_6]$ .

## **2.3 Detection of $\cdot\text{OH}$ radicals:**

Formation of hydroxyl radicals ( $\cdot\text{OH}$ ) produced on the surface of as-synthesized CdS/WS<sub>2</sub>-MoS<sub>2</sub> nanostructures under simulated sunlight irradiation, was detected by the photoluminescence (PL) technique using terephthalic acid (TA) as a probe molecule. For the reaction we taken 10 mg of CdS/WS<sub>2</sub>-MoS<sub>2</sub> were dispersed in a 40 mL of the  $5\times 10^{-4}$  M TA aqueous solution with a concentration of NaOH ( $2\times 10^{-3}$  M) solution at room temperature. The suspension was irradiated by a simulated sunlight irradiation. At every one hour, 5 mL of the suspension was collected and centrifuged for 15 min. Finally PL spectra of generated 2-hydroxyterephthalic acid were measured by a Hitachi F-7000 fluorescence spectrophotometer.

### 3. Supporting Figures

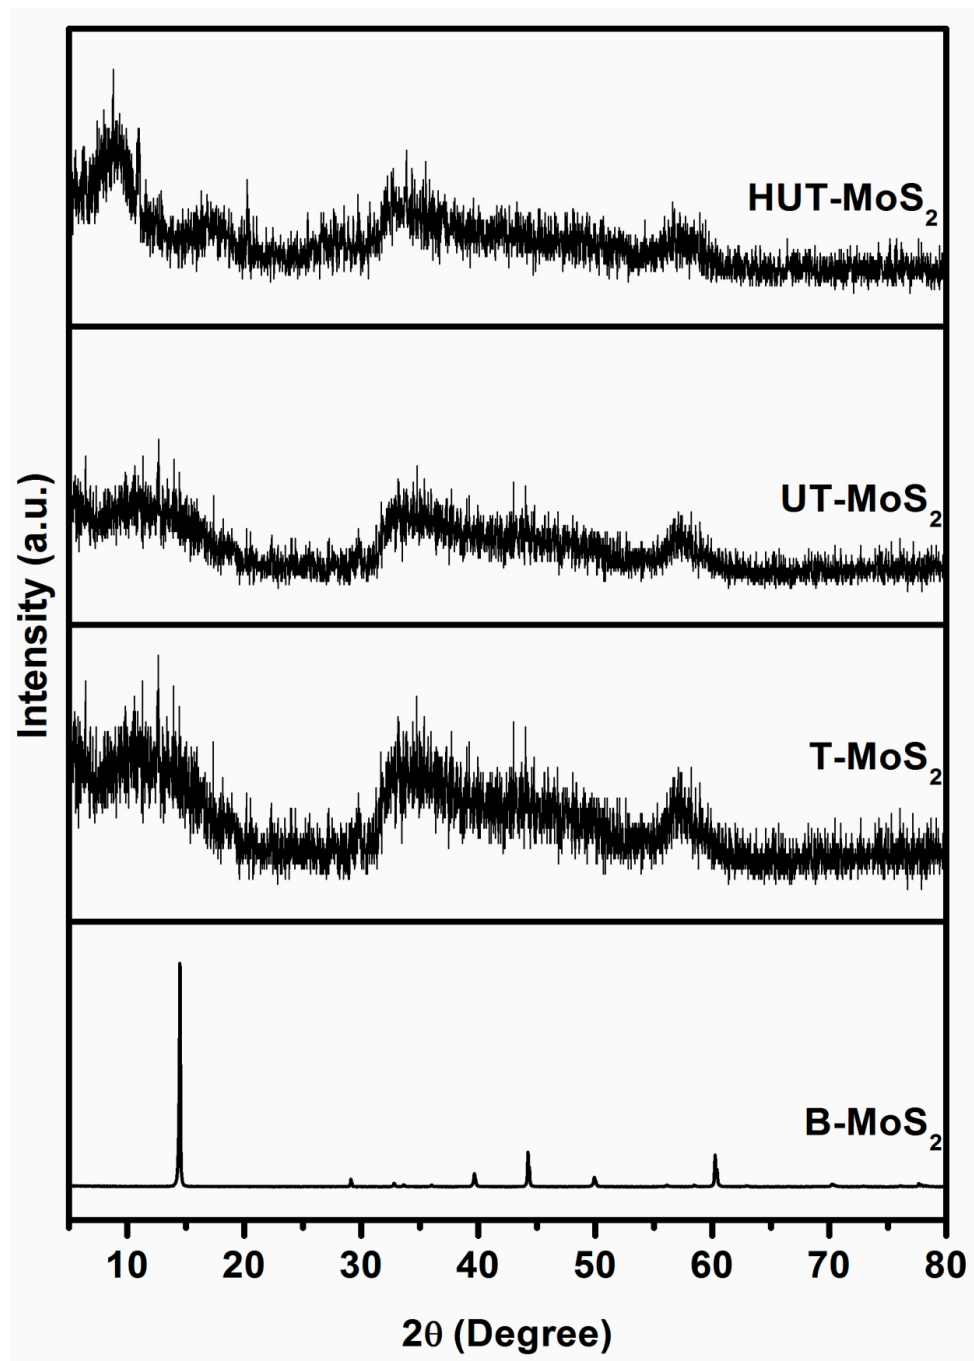

**Figure S1.** XRD patterns of B-MoS<sub>2</sub>, T-MoS<sub>2</sub>, UT-MoS<sub>2</sub> and HUT-MoS<sub>2</sub> nanostructures.

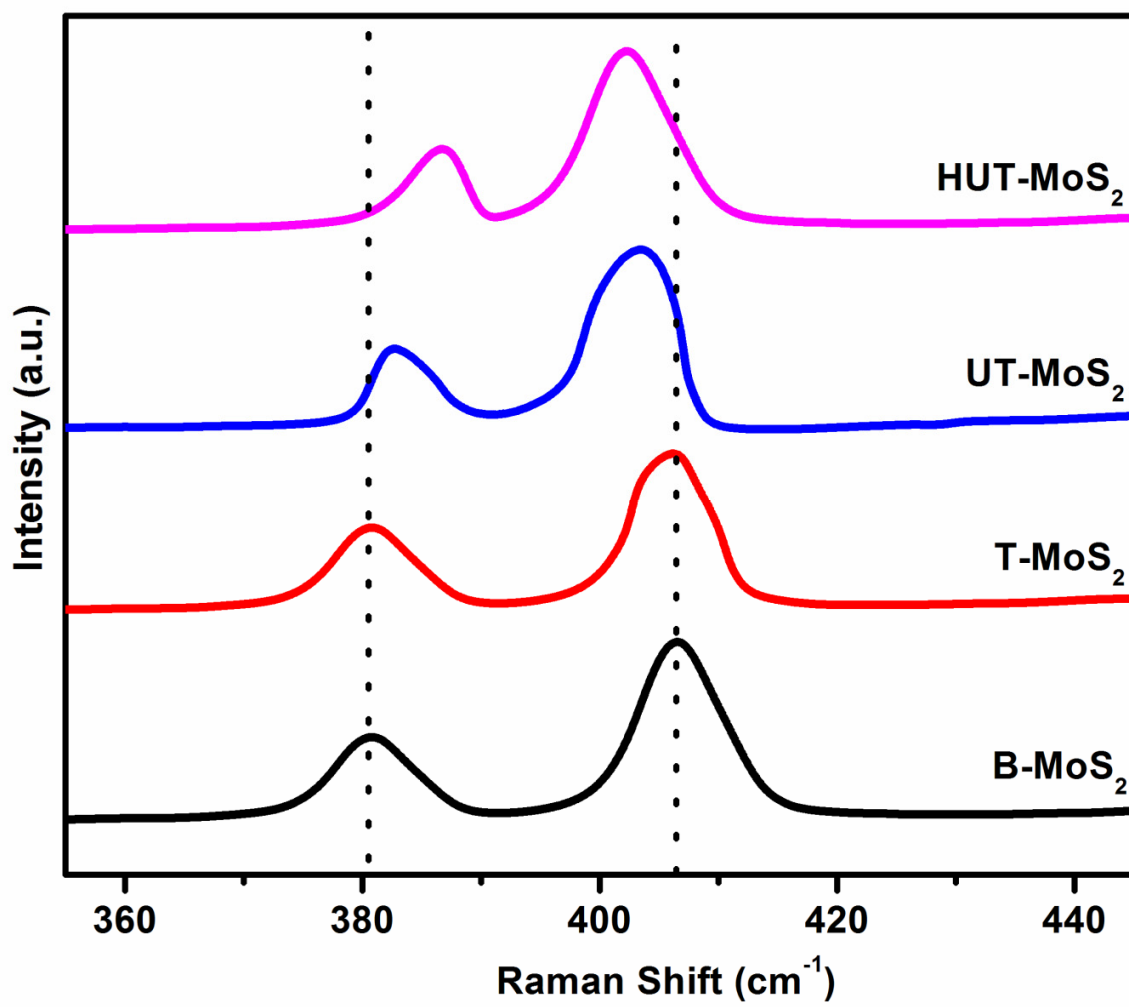

**Figure S2.** Raman spectra of B-MoS<sub>2</sub>, T-MoS<sub>2</sub>, UT-MoS<sub>2</sub> and HUT-MoS<sub>2</sub> nanostructures.

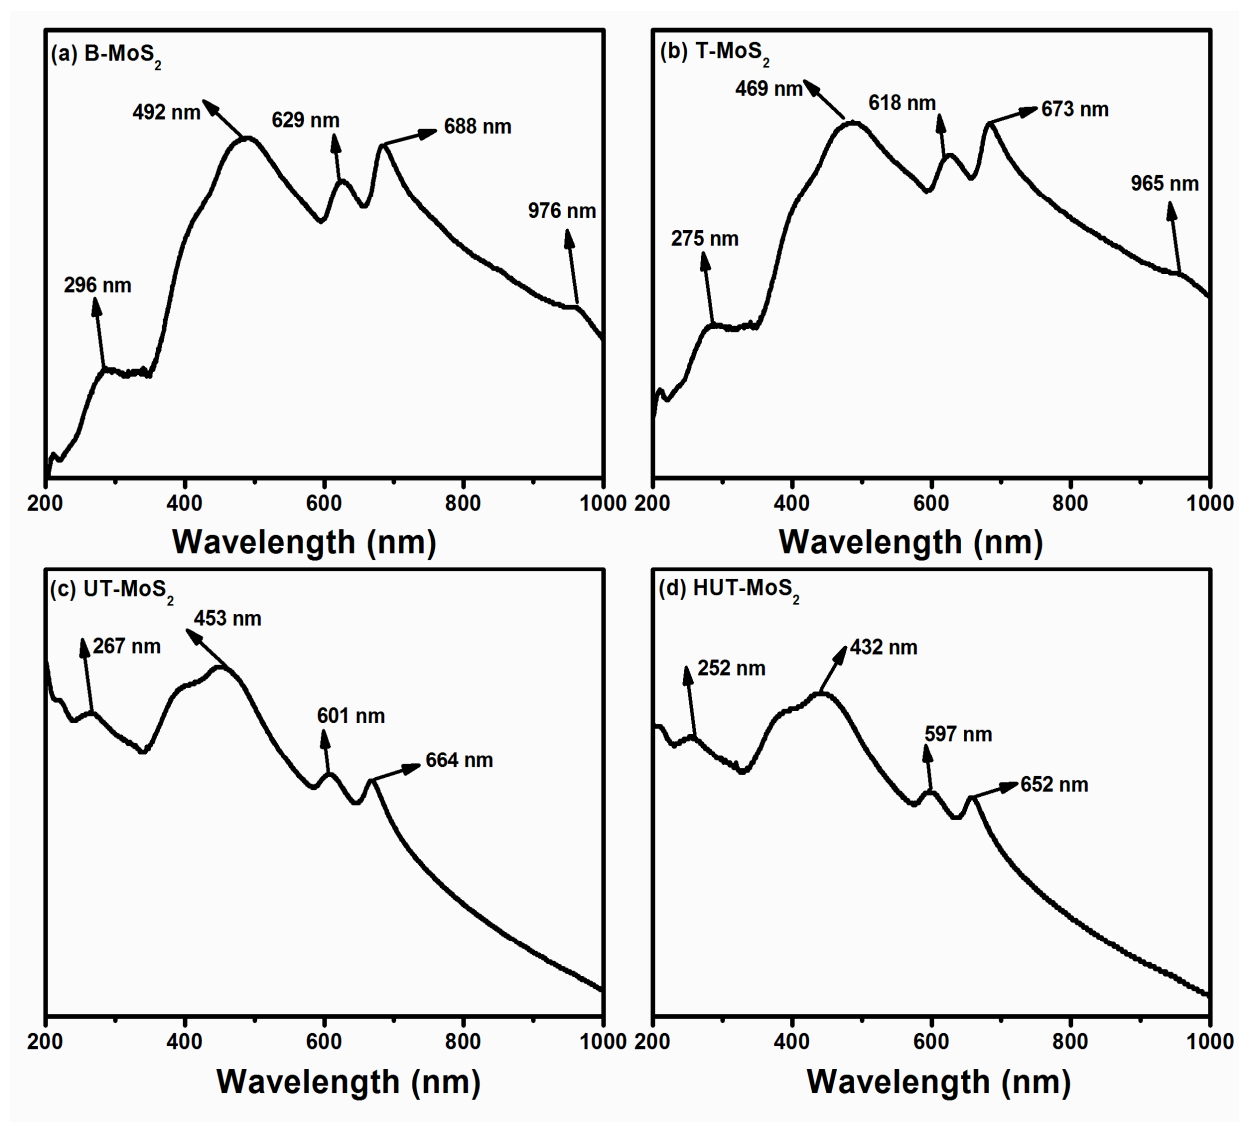

**Figure S3.** UV-Vis absorption spectra of (a) B-MoS<sub>2</sub> (b) T-MoS<sub>2</sub> (c) UT-MoS<sub>2</sub> and (d) HUT-MoS<sub>2</sub> nanostructures.

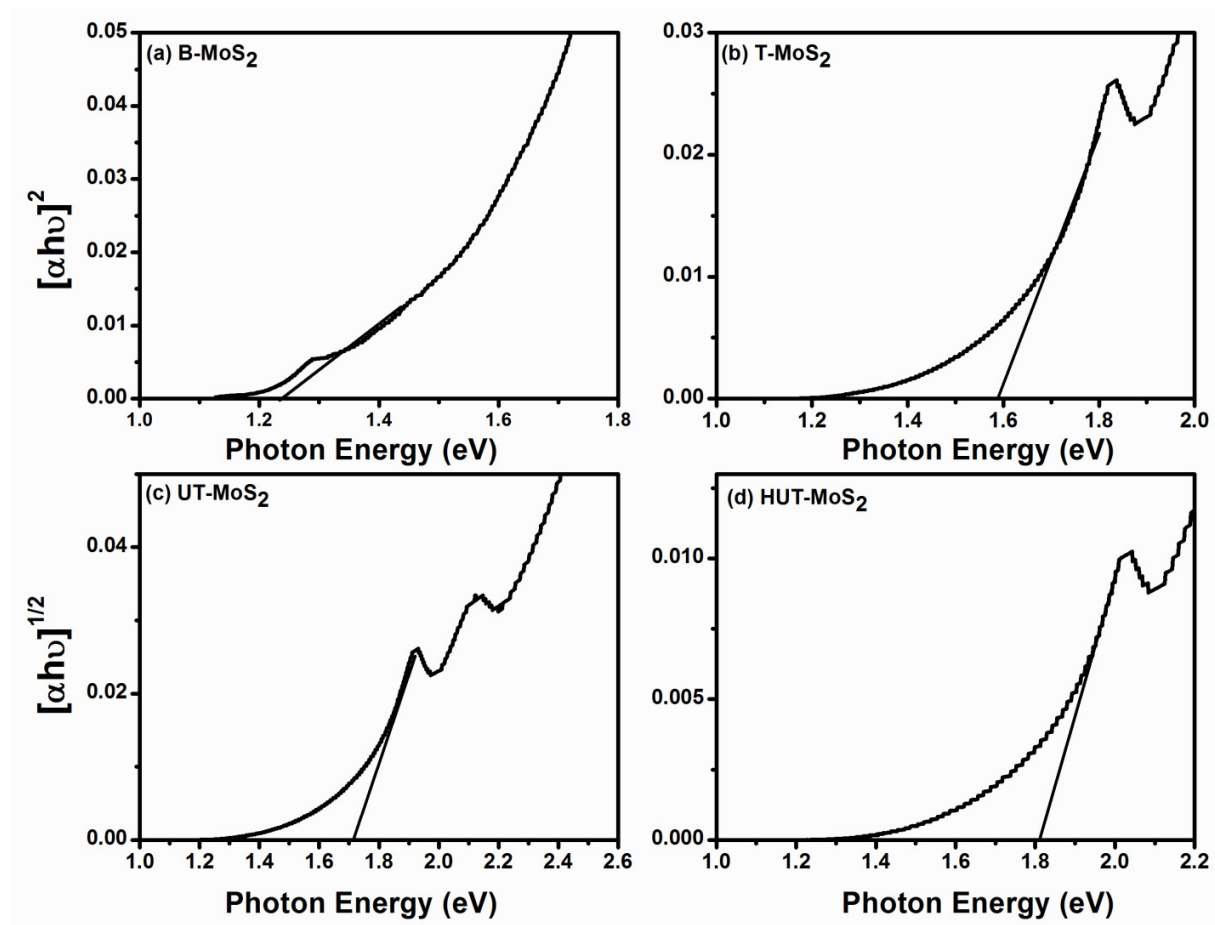

**Figure S4.** Tauc plots and band gap energy estimation (a) B-MoS<sub>2</sub> (b) T-MoS<sub>2</sub> (c) UT-MoS<sub>2</sub> and (d) HUT-MoS<sub>2</sub> nanostructures.



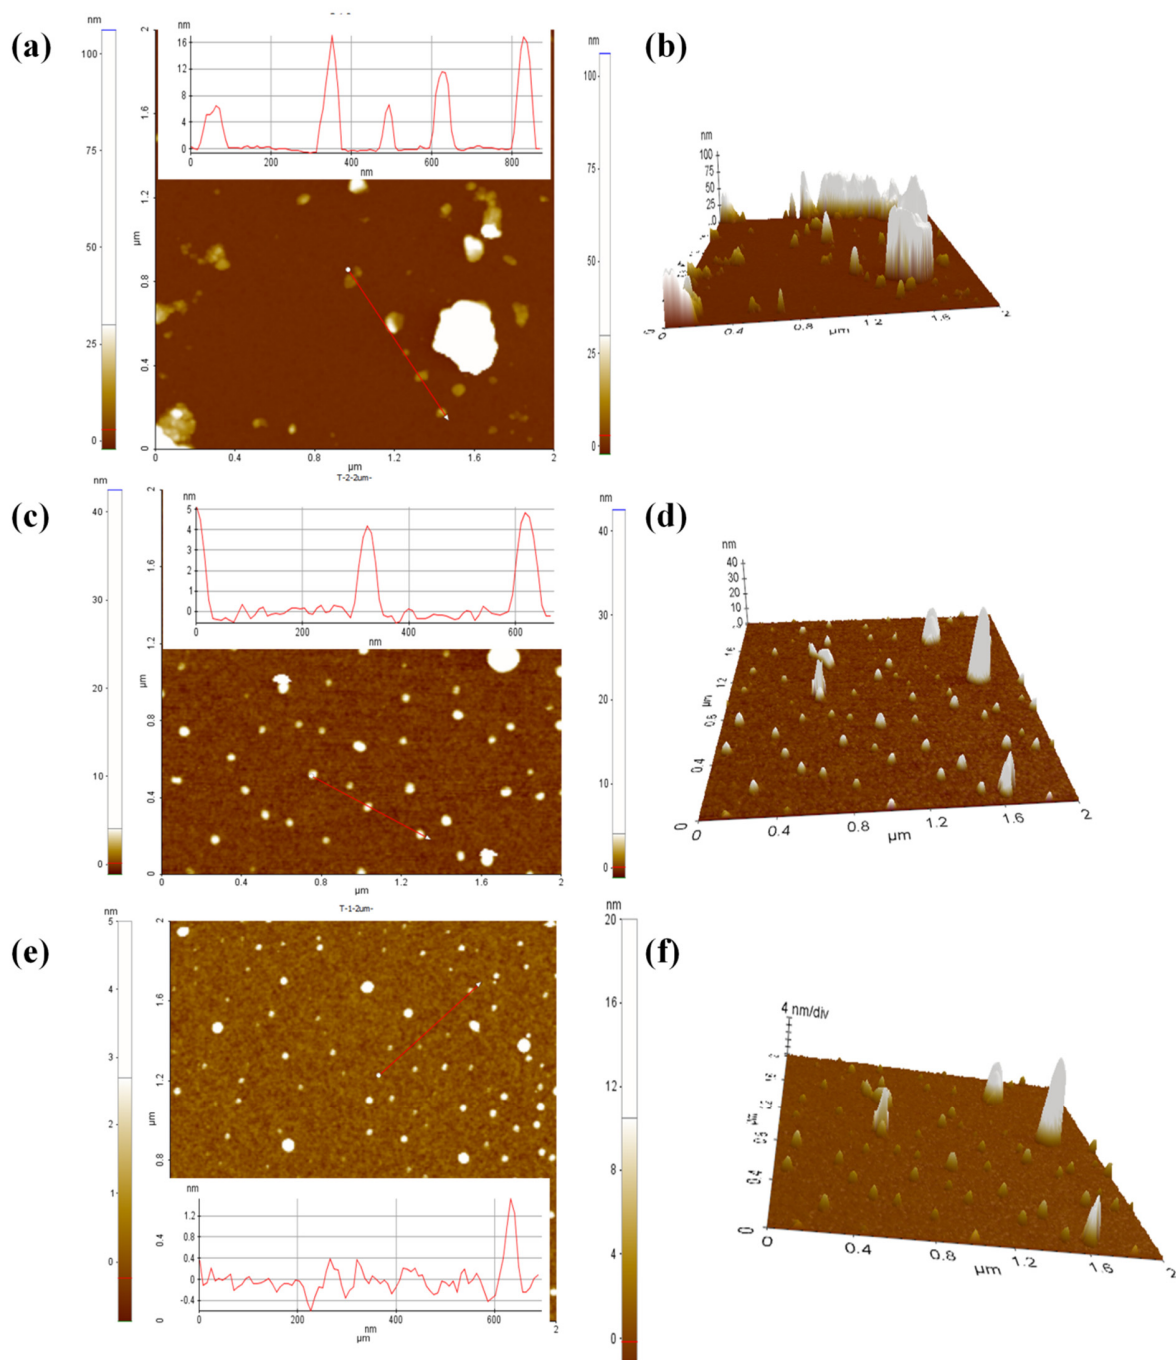

**Figure S5.** AFM micrographs of 2D, 3D micrographs and corresponding height profiles (a, b) T-MoS<sub>2</sub> (c, d) UT-MoS<sub>2</sub> and (d) HUT-MoS<sub>2</sub> nanostructures.

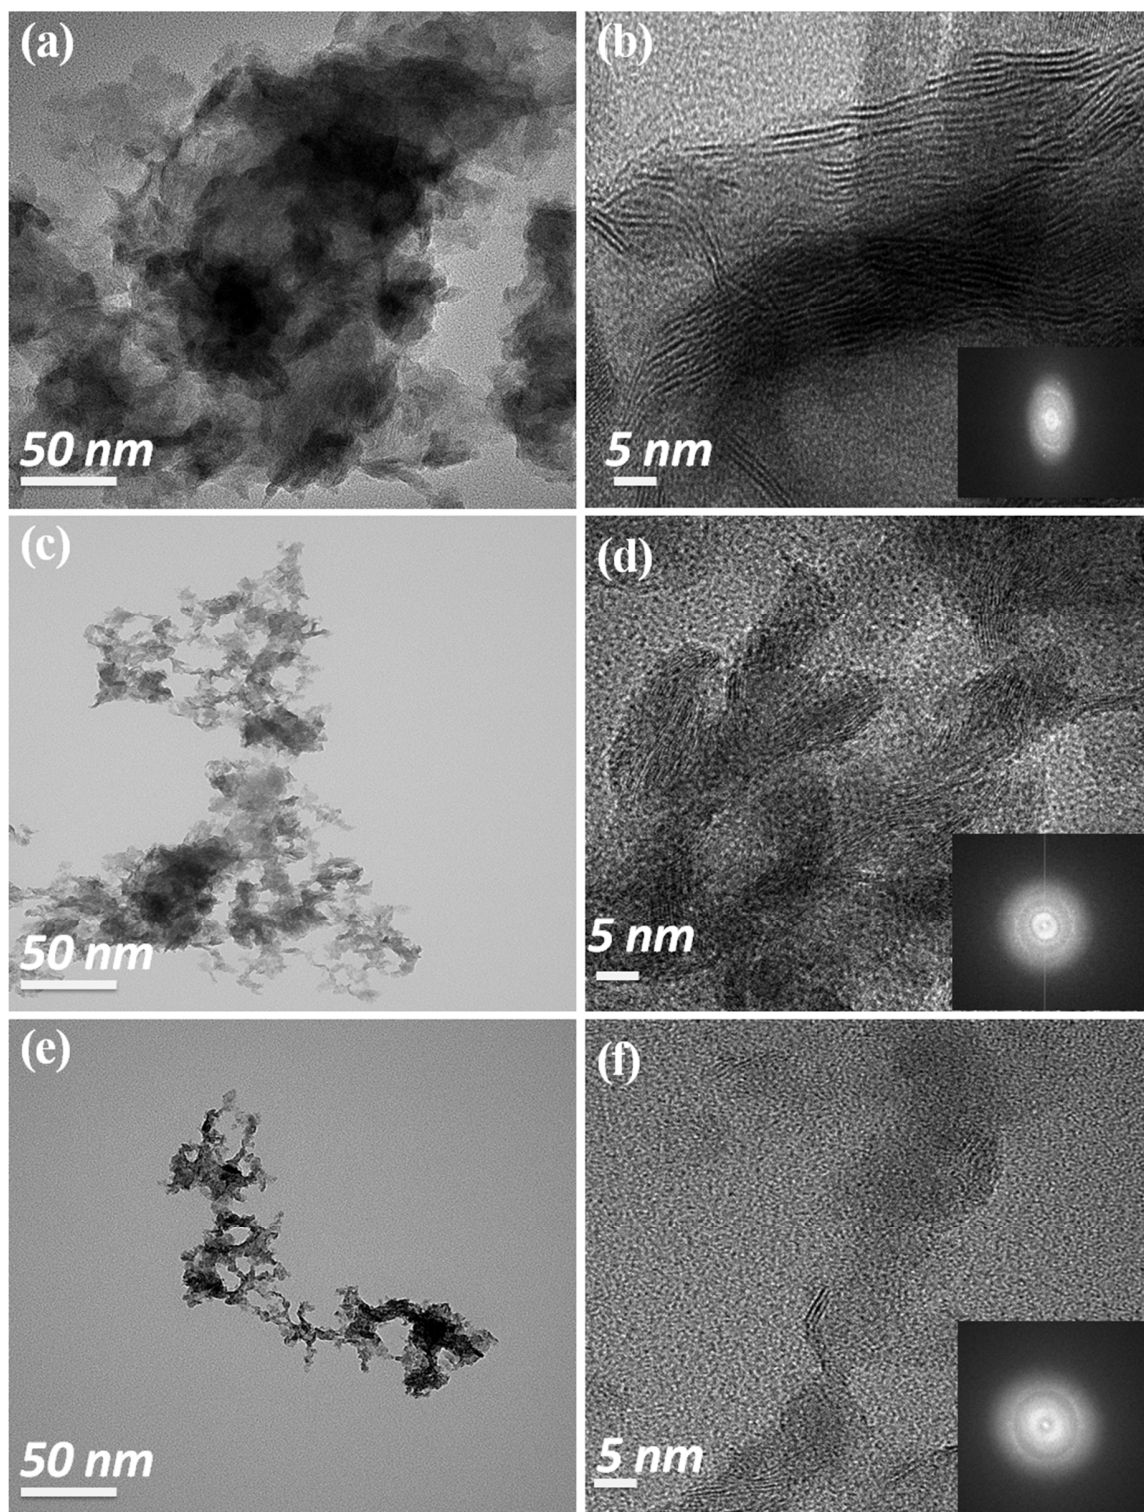

**Figure S6.** TEM, HRTEM and corresponding SAED patterns of (a, b) B-MoS<sub>2</sub> nanosheets, (c, d) UT-MoS<sub>2</sub> nanosheets, and (e, f) HUT-MoS<sub>2</sub> nanostructures.

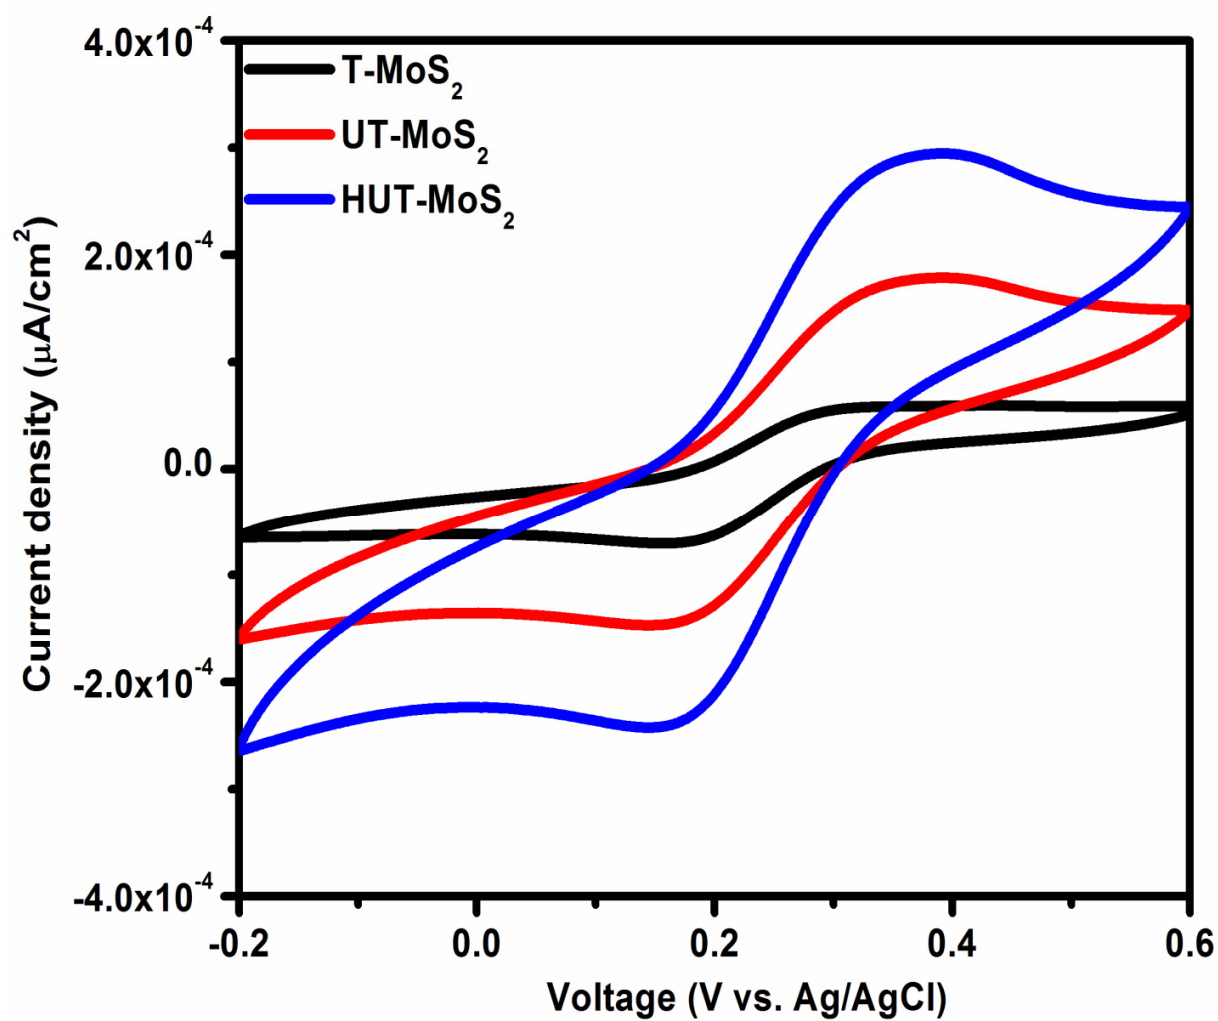

**Figure S7.** Cyclic voltammograms of the as-synthesized T-MoS<sub>2</sub>, UT-MoS<sub>2</sub> and HUT-MoS<sub>2</sub> nanosheets.

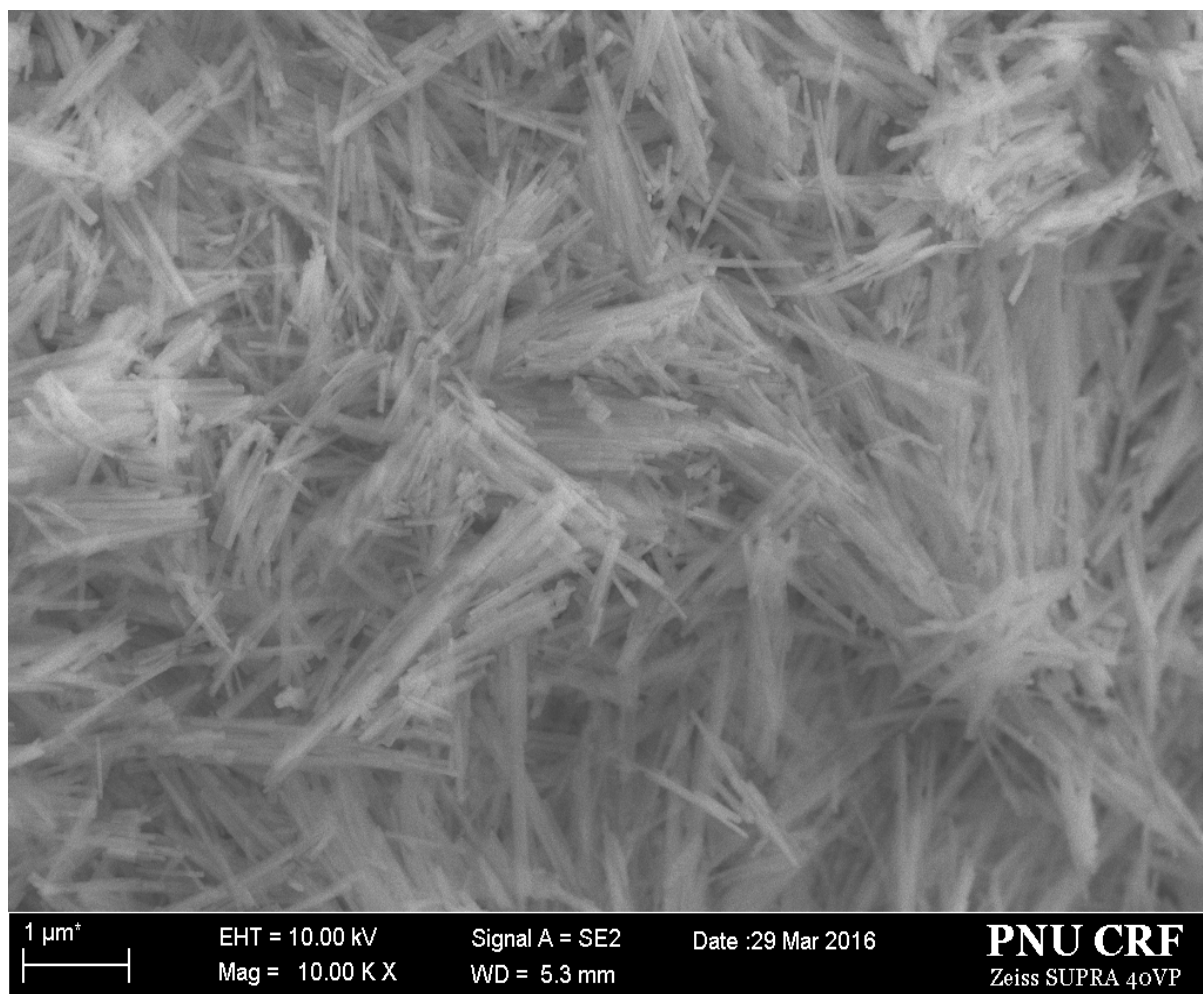

**Figure S8.** FESEM image of as-synthesized CdS nanostructures.

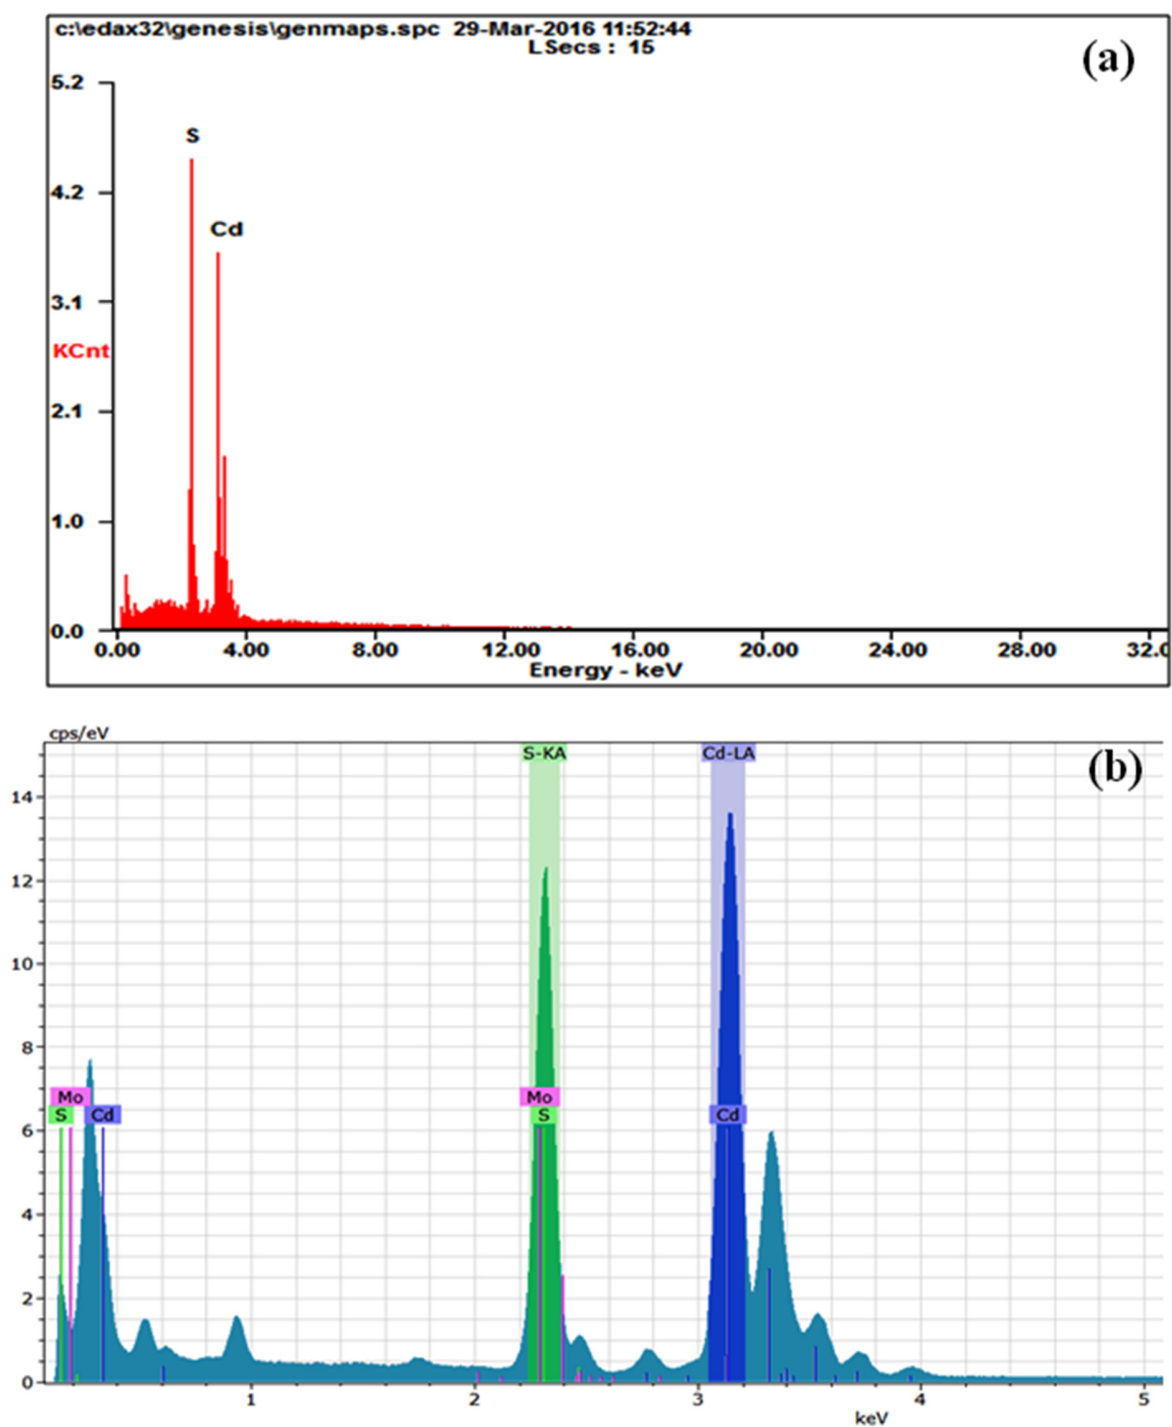

**Figure S9.** EDS spectra of (a) CdS and (b) CdS/HUT-MoS<sub>2</sub> nanocomposites.



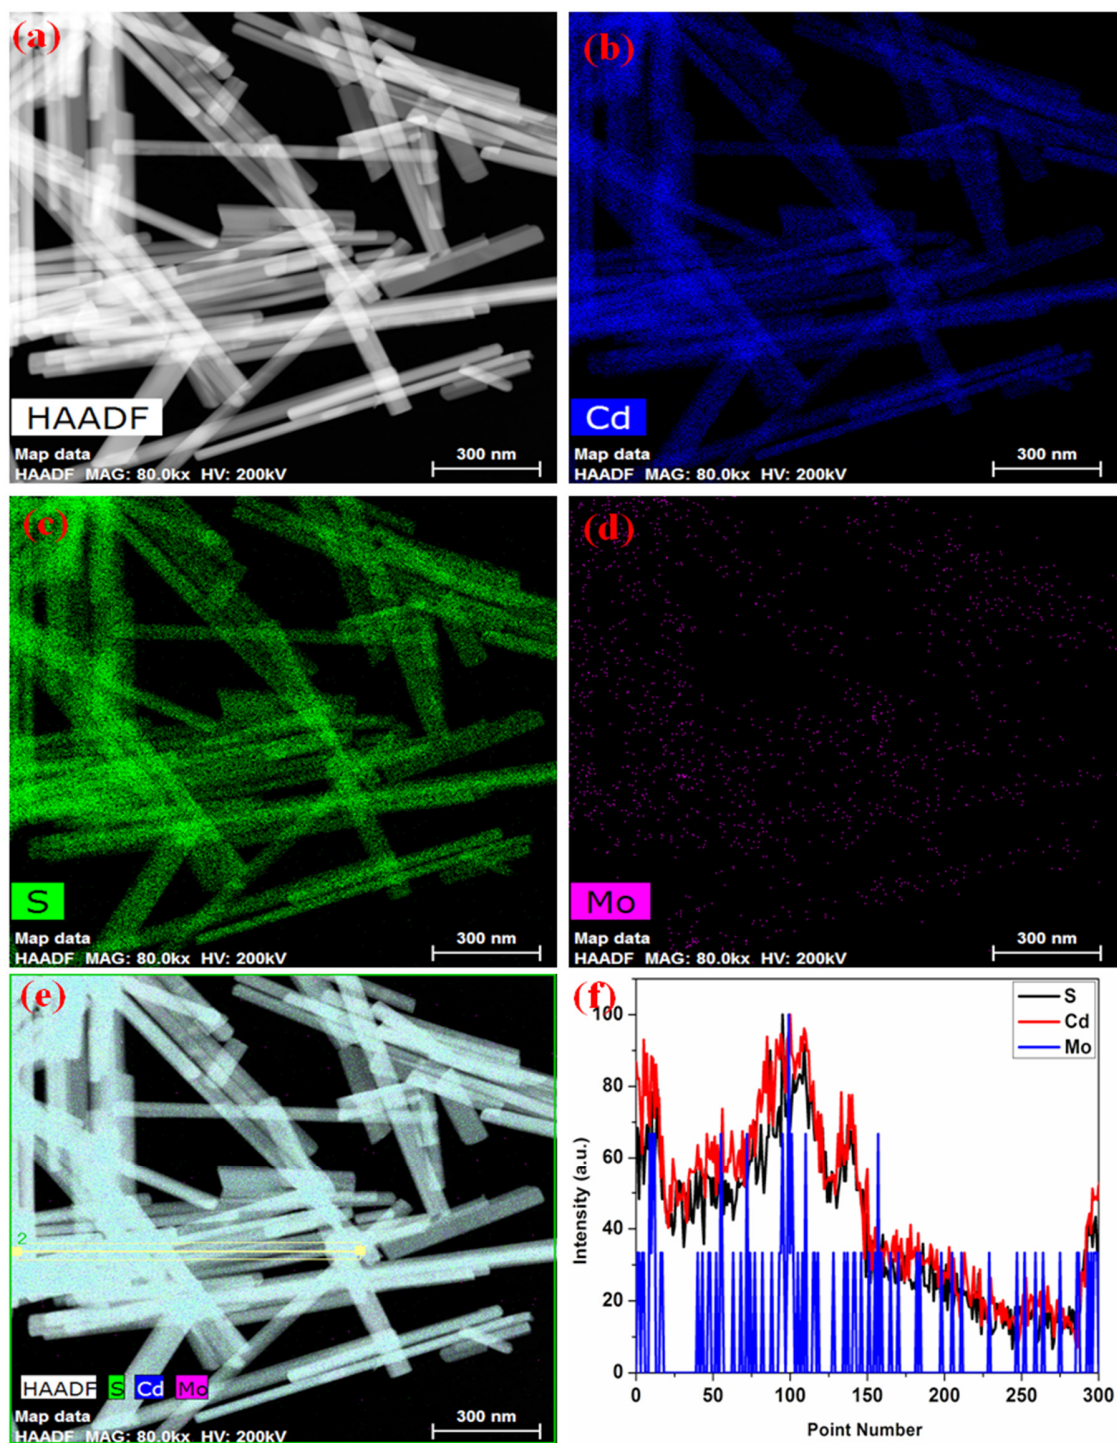

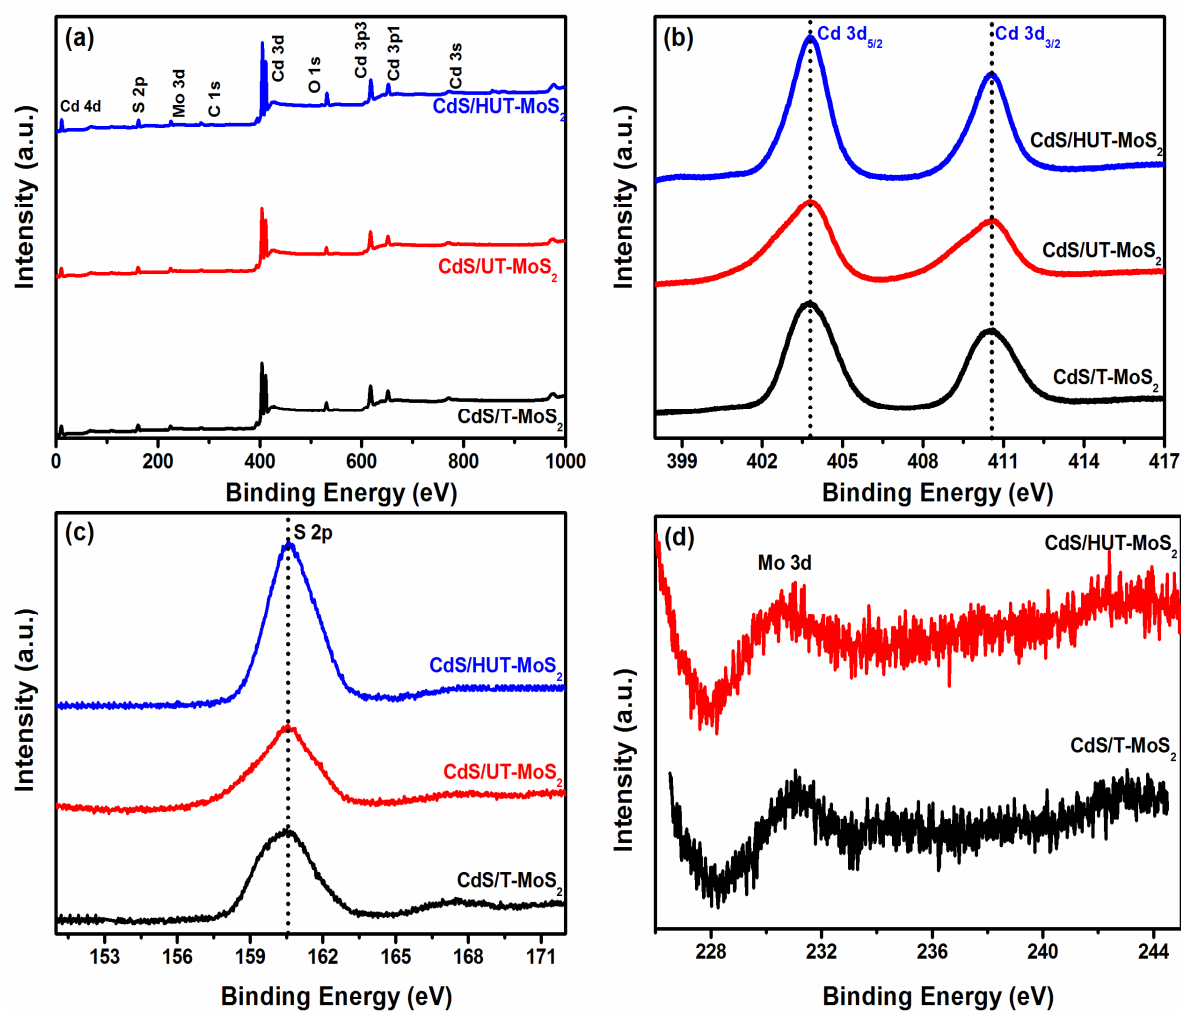

**Figure S11.** Comparison of XPS survey and narrow XPS spectra of CdS/T-MoS<sub>2</sub>, CdS/UT-MoS<sub>2</sub>, and CdS/HUT-MoS<sub>2</sub> nanostructures.

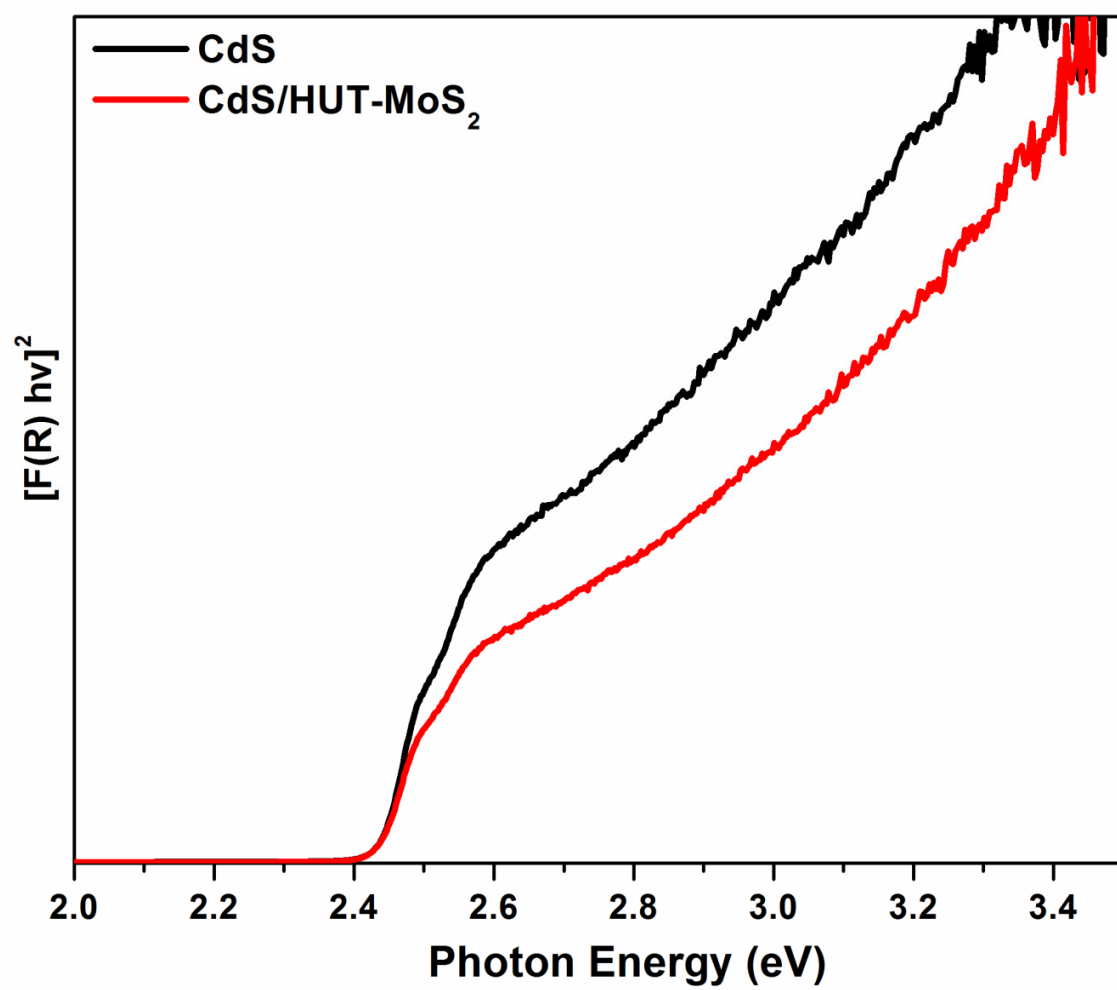

**Figure S12.** Kubelka–Munk plots of CdS and CdS/HUT-MoS<sub>2</sub> nanocomposite.



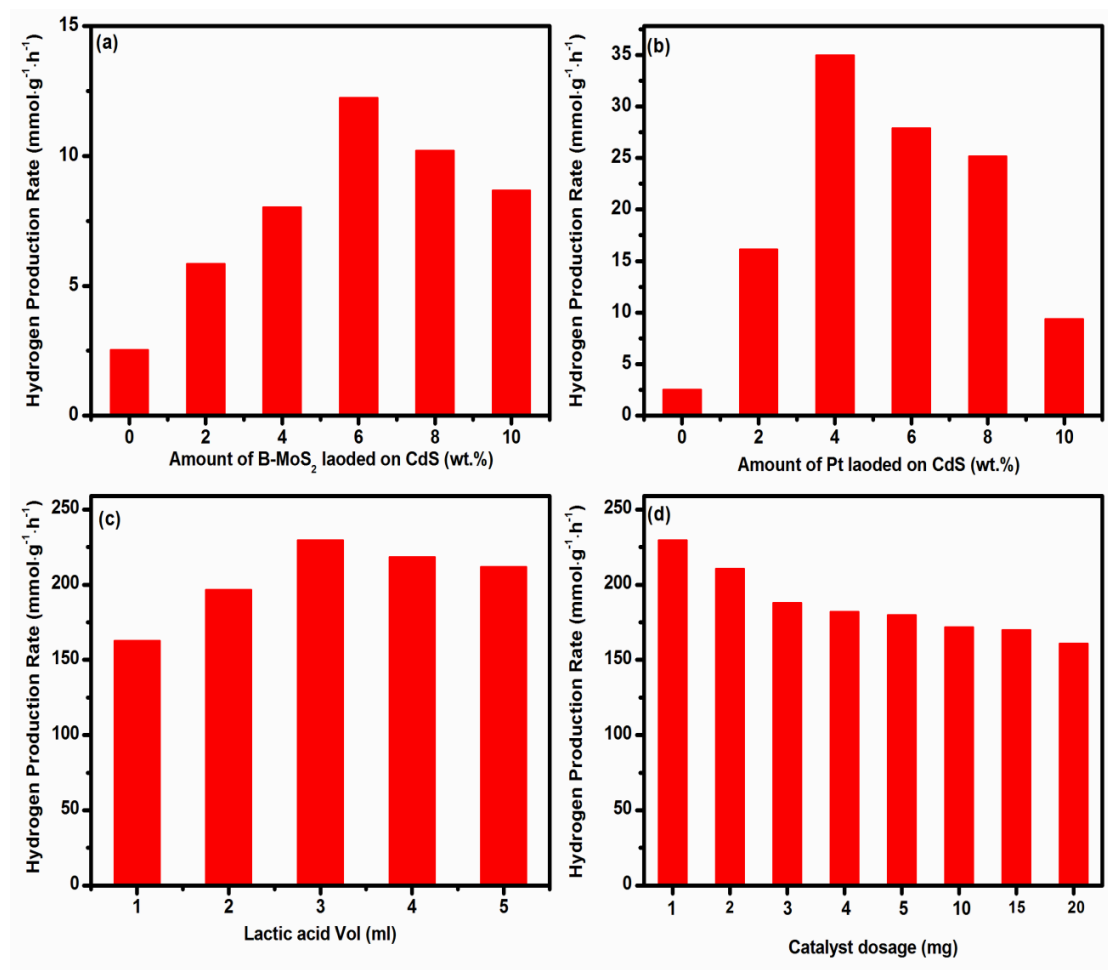

**Figure S13.** Hydrogen production rate in a 15-mL aqueous solution containing lactic acid 20 % with suspended (a) CdS/B-MoS<sub>2</sub>, (b) CdS/Pt, nanocomposites (1 mg) containing 0, 2, 4, 6, 8, and 10 wt.% of B-MoS<sub>2</sub>, and Pt, respectively. (c) Effect of sacrificial lactic acid concentration on the hydrogen evolution rate (photocatalyst: CdS/HUT-MoS<sub>2</sub>-1 nanocomposite; photocatalyst dose: 1 mg; time: 5 h). (d) Effect of photocatalyst dose on hydrogen production rate (photocatalyst: CdS/HUT-MoS<sub>2</sub>-1 nanocomposite; photocatalyst dose: 1, 2, 3, 4, 5, 10, 15 and 20 mg; time: 5 h).

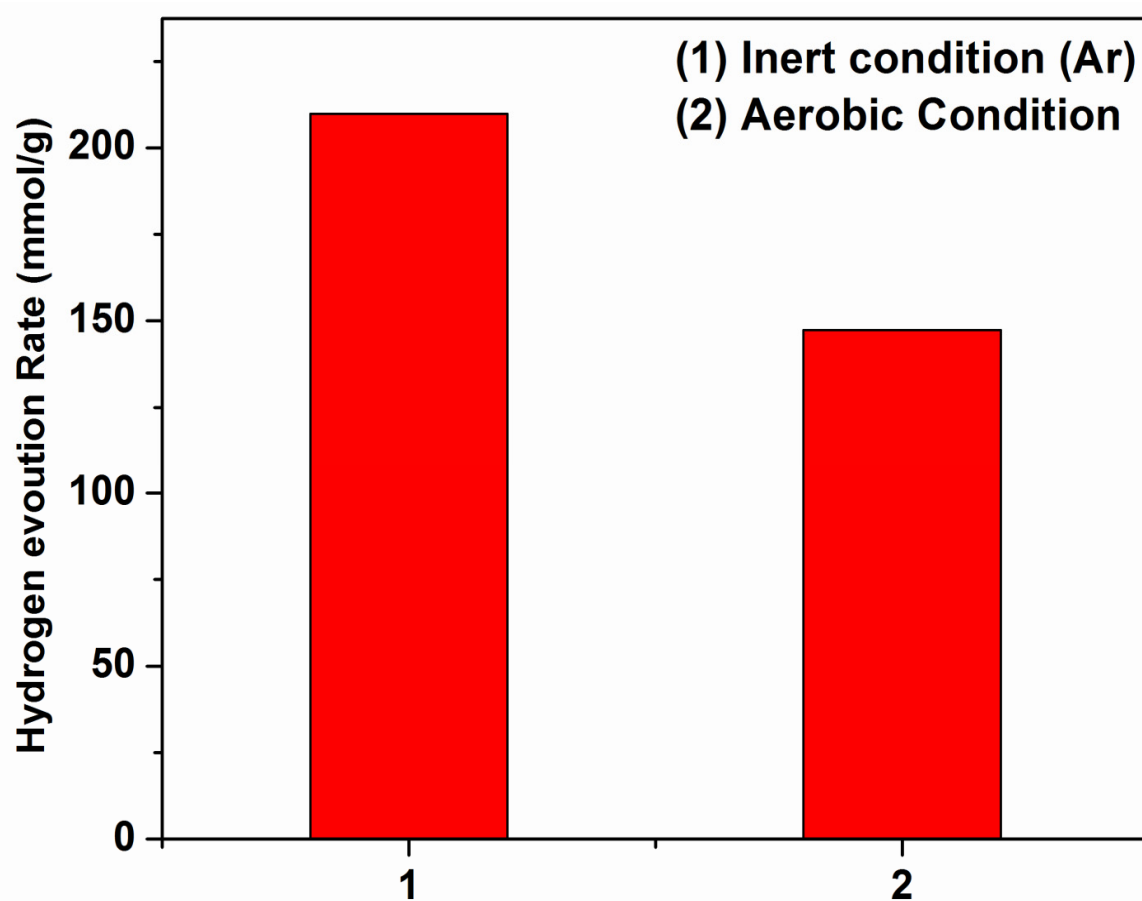

**Figure S14.** Photocatalytic hydrogen evolution rate of CdS/HUT-MoS<sub>2</sub> nanostructures (1) under inert condition (2) under aerobic conditions.

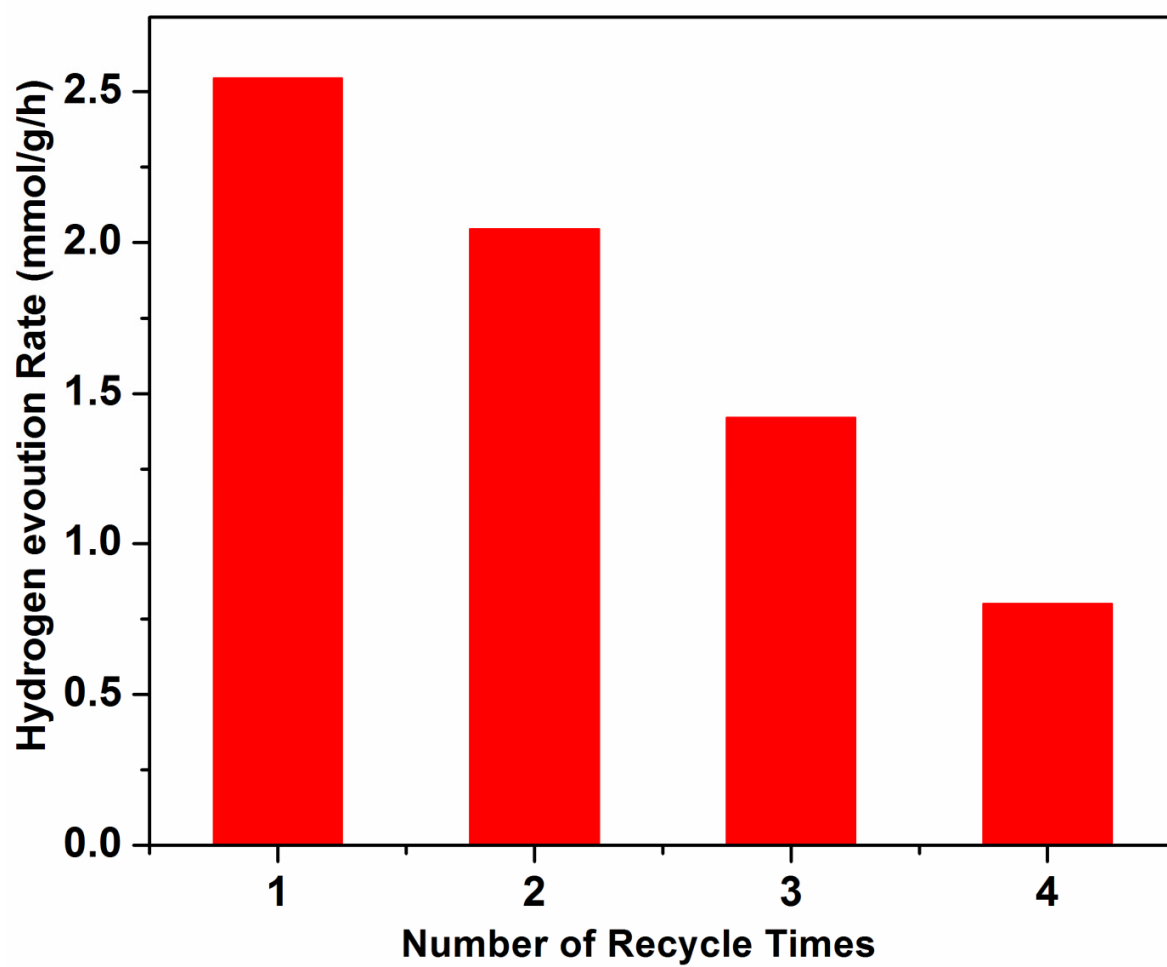

**Figure S15.** Recycling measurement of hydrogen production using the as-synthesized CdS nanostructures.

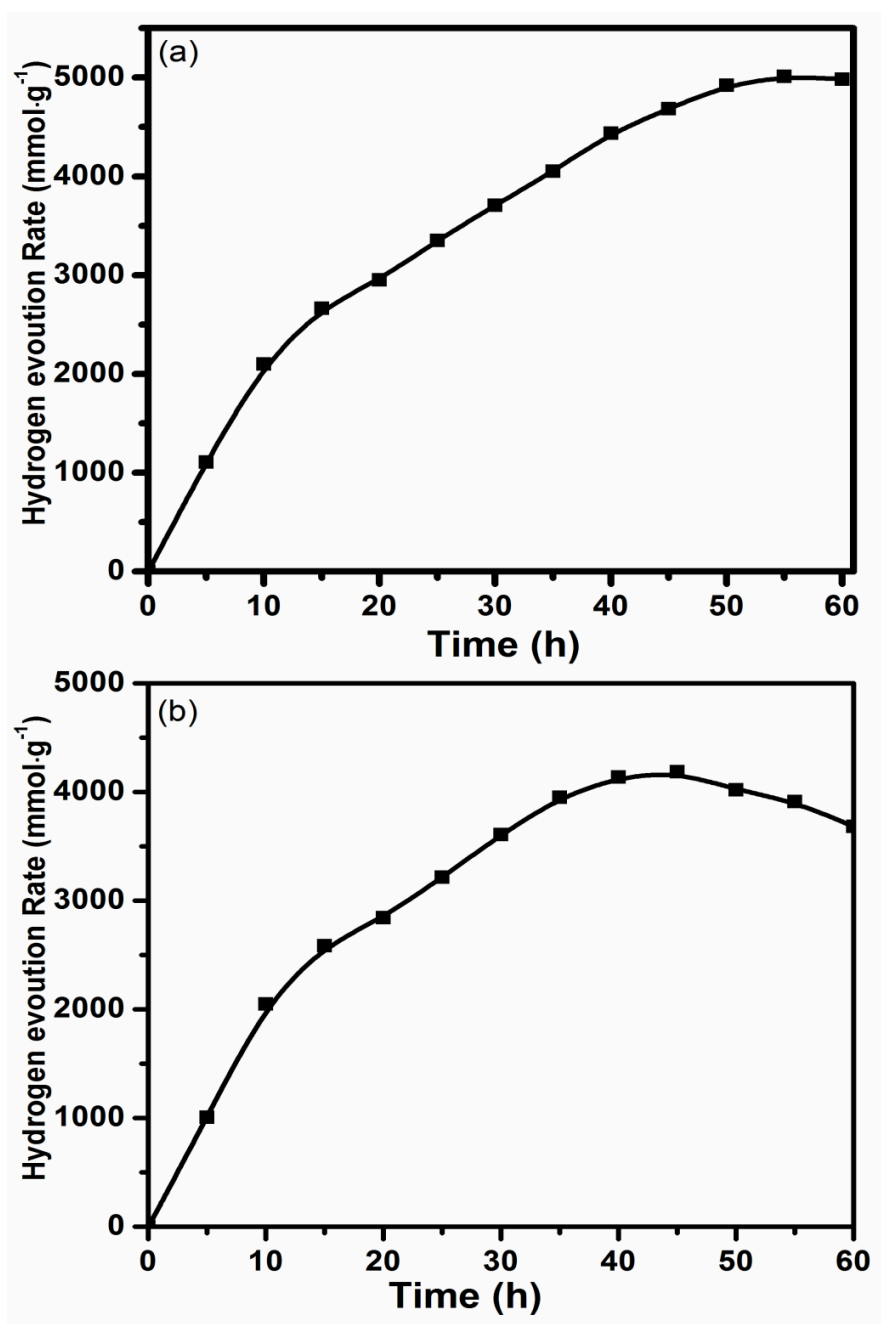

**Figure S16.** (a) Long-term stability test of hydrogen evolution over the optimized CdS/MoS<sub>2</sub>-HUT-1 nanocomposite under Ar. (b) Long-term stability of CdS/HUT-MoS<sub>2</sub> after degassing photocatalytic reactor.

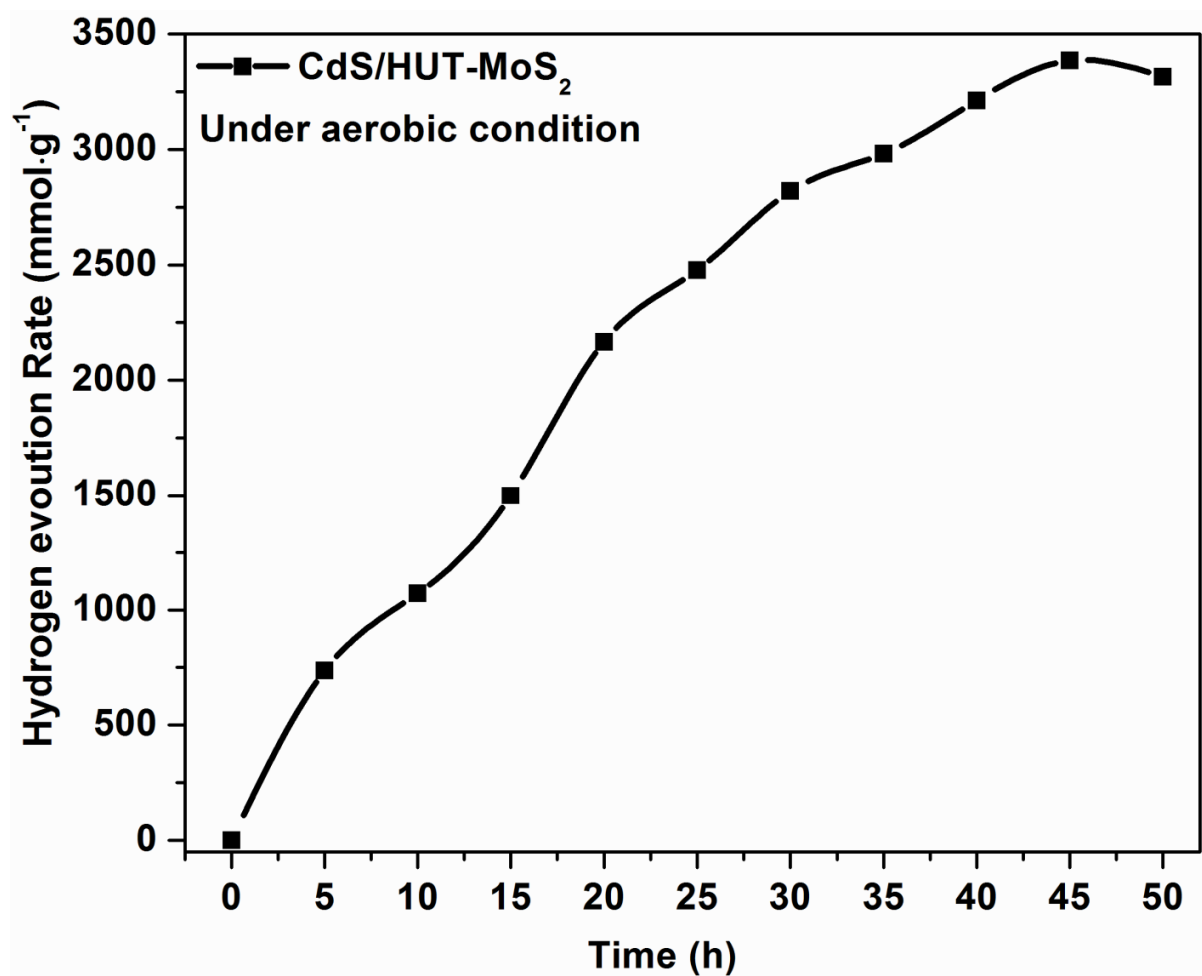

**Figure S17.** Long-term stability test of hydrogen evolution over the optimized CdS/MoS<sub>2</sub>-HUT-1 nanocomposite under aerobic conditions.

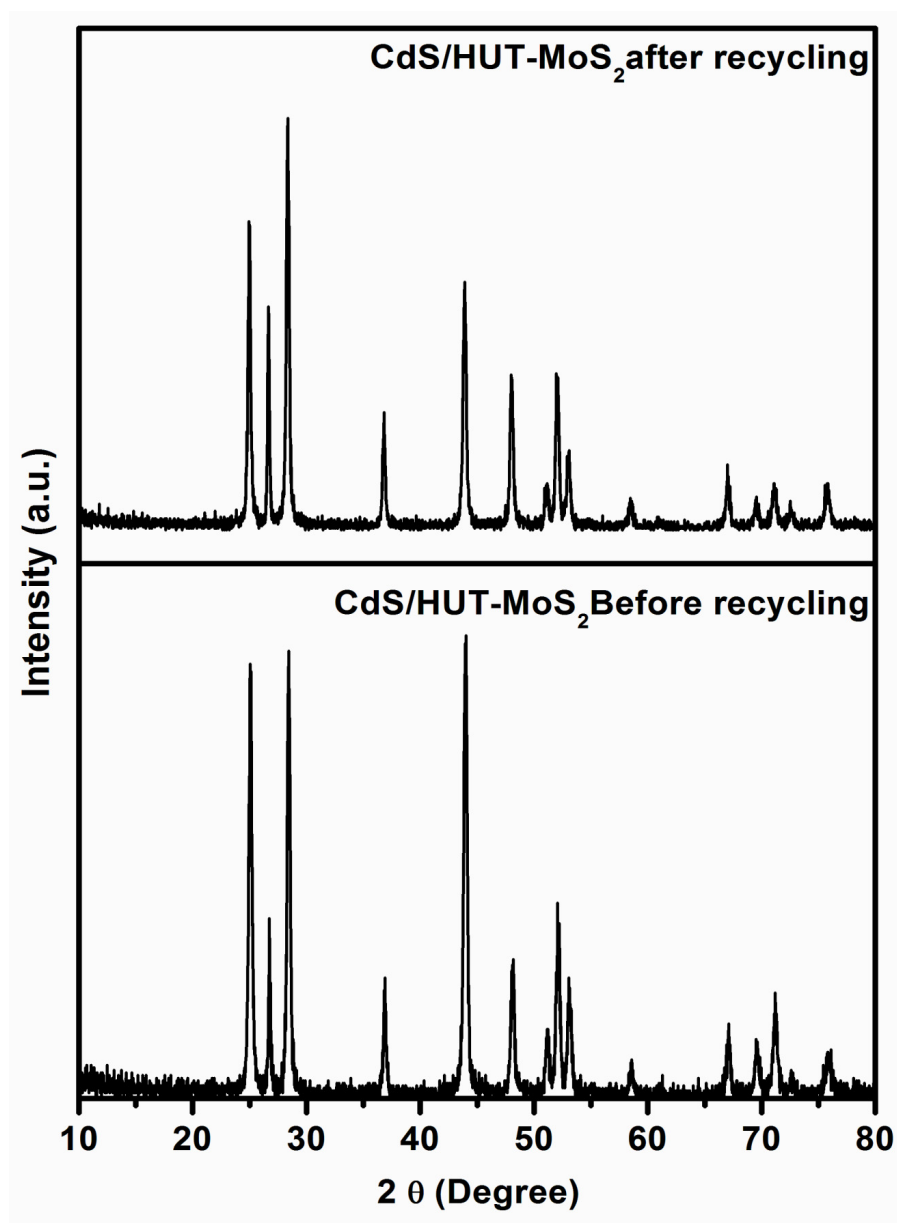

**Figure S18.** The XRD patterns of CdS/HUT-MoS<sub>2</sub> nanocomposite before and after photocatalytic recycling measurement.

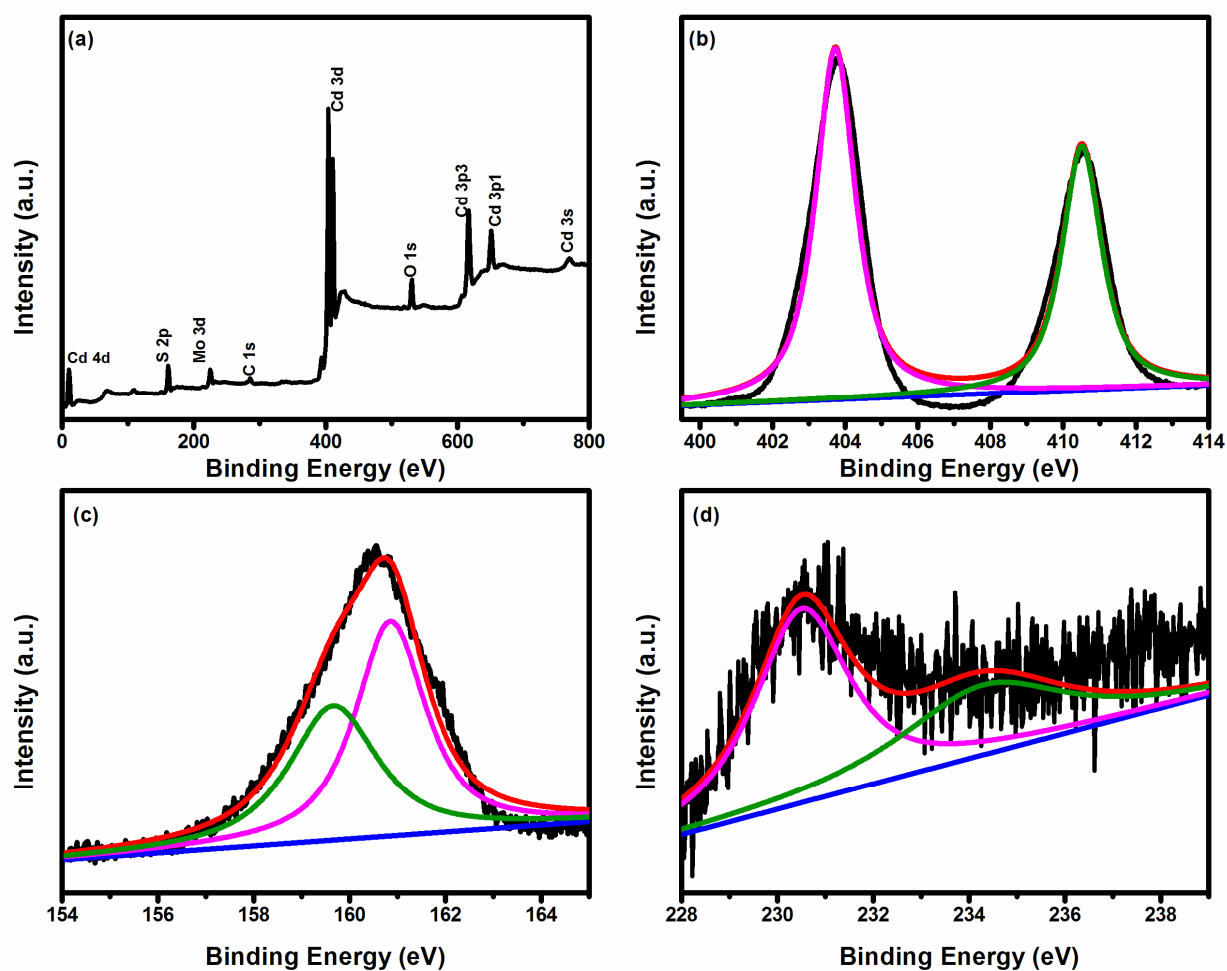

**Figure S19.** The XPS patterns of CdS/HUT-MoS<sub>2</sub> nanocomposite after photocatalytic recycling measurement: (a) survey spectrum and (b-d) narrow scan XPS spectra of Cd 3d, S 2p and Mo 3d respectively.

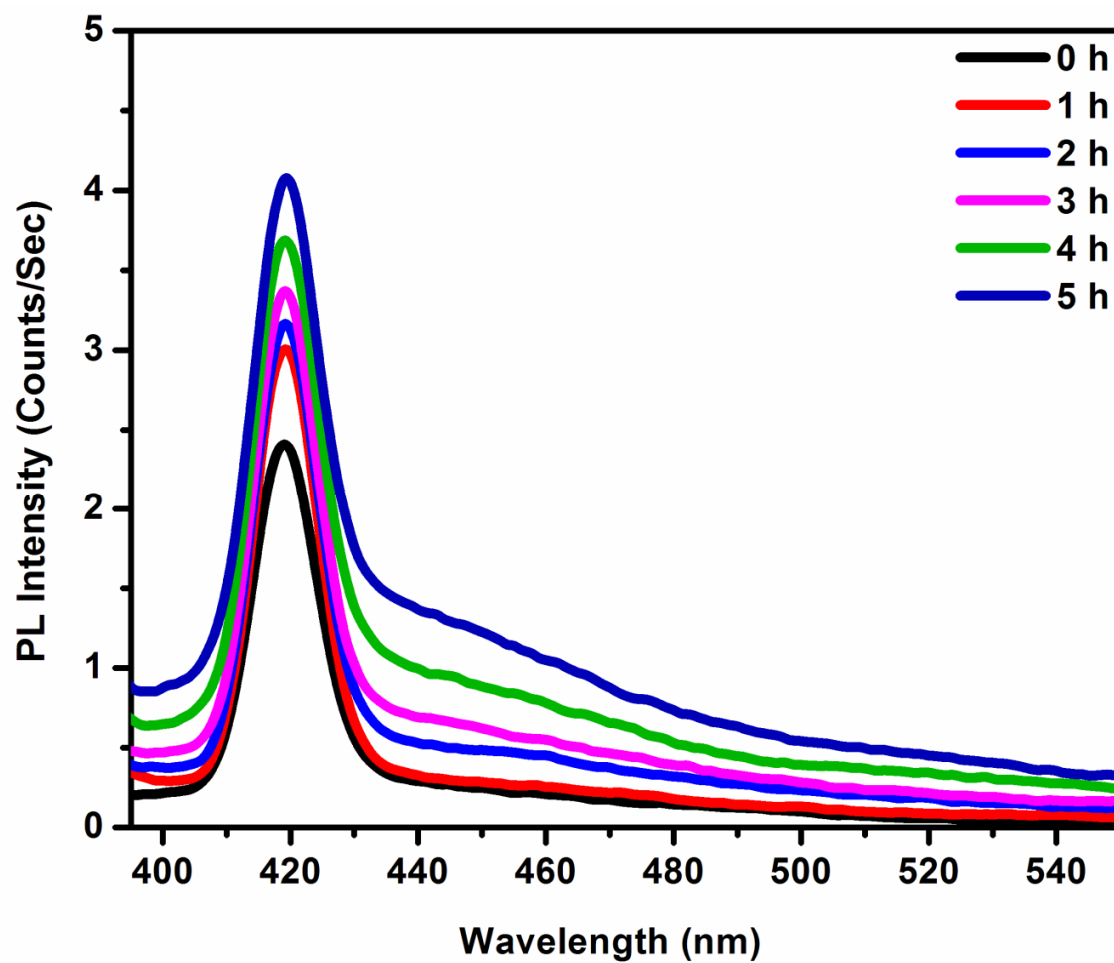

**Figure S20.** The terephthalic acid (TA) PL approach to know the OH radicals produced during the photocatalytic reaction process using CdS/HUT-MoS<sub>2</sub> nanocomposite under simulated sunlight irradiation.



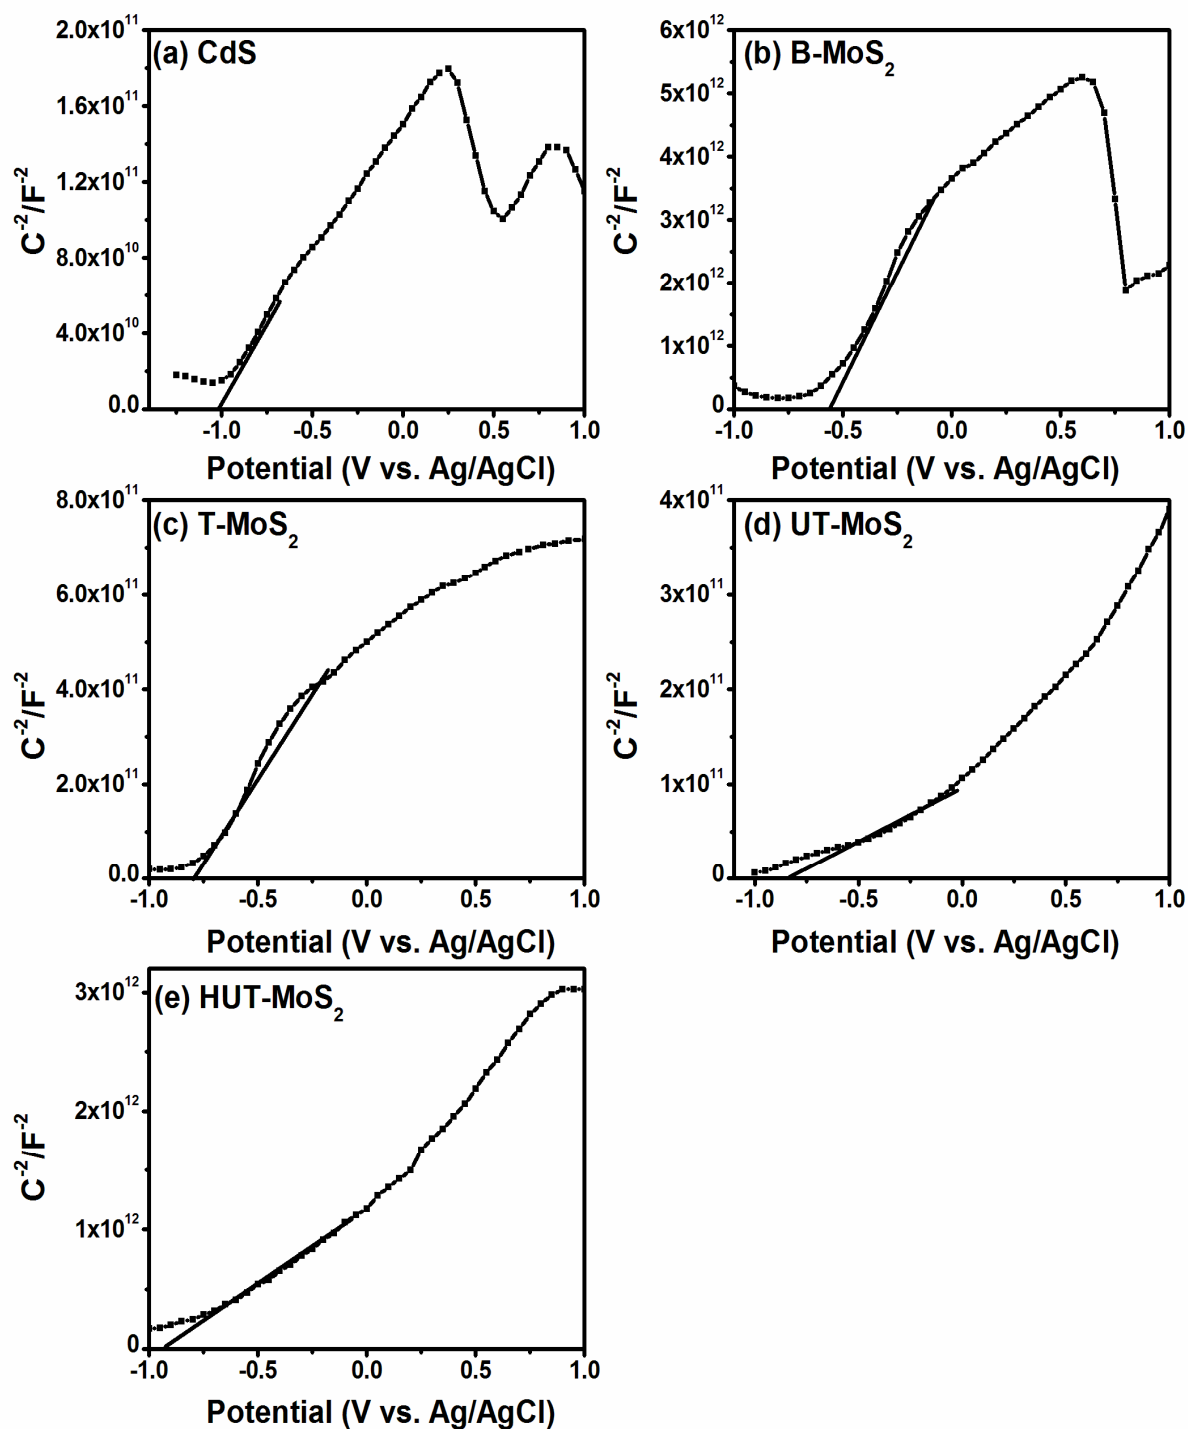

**Figure S21.** Mott-Schottky plots of (a) CdS nanorods, (b) B-MoS<sub>2</sub>, (c) T-MoS<sub>2</sub> (d) UT-MoS<sub>2</sub> and (e) HUT-MoS<sub>2</sub> nanostructures.

**Table S1.** Comparison of photocatalytic H<sub>2</sub> evolution rate reported in the literature using MoS<sub>2</sub> based nanostructures as a co-catalyst on CdS nanostructures with our present results

| Photocatalyst                                                              | Catalyst Amount (mg) | Scavenger                                              | Light Source                                                                                                   | Hydrogen Evolution Rate (mmol/g/h)     | QE (%)       | Ref.              |
|----------------------------------------------------------------------------|----------------------|--------------------------------------------------------|----------------------------------------------------------------------------------------------------------------|----------------------------------------|--------------|-------------------|
| <b>CdS/HUT-MoS<sub>2</sub></b>                                             | <b>1</b>             | <b>Lactic acid</b>                                     | <b>Natural Sunlight</b><br><b>AM 1.5G</b><br><b>150 W Xe lamp</b><br><b>(<math>\lambda &gt; 425</math> nm)</b> | <b>238</b><br><b>209</b><br><b>142</b> | <b>53.3</b>  | <b>This Study</b> |
| CdS/Ag-MoS <sub>2</sub><br>CdS/Cr-MoS <sub>2</sub><br>CdS/MoS <sub>2</sub> | 10                   | Na <sub>2</sub> S<br>+ Na <sub>2</sub> SO <sub>3</sub> | 300 W Xe lamp<br>( $\lambda > 420$ nm)                                                                         | 107<br>38<br>18                        | -            | S1                |
| CdS/UT-MoS <sub>2</sub>                                                    | 20                   | Lactic acid                                            | 300 W Xe lamp<br>( $\lambda > 400$ nm)                                                                         | 95.7                                   | 46.9         | S2                |
| CdS/N-RGO-MoS <sub>2</sub> ,<br>CdS/SL-MoS <sub>2</sub>                    | 30                   | Lactic acid                                            | Solar simulator<br>(150 W Xe lamp)                                                                             | 52.66<br>30.0                          | -            | S3                |
| CdS/MoS <sub>2</sub>                                                       | 200                  | Lactic acid                                            | 300 W Xe lamp<br>( $\lambda > 420$ nm)                                                                         | 49.80                                  | 41.37        | S4                |
| CdS/UIO-66/MoS <sub>2</sub>                                                | 20                   | Lactic acid                                            | 300 W Xe lamp<br>( $\lambda > 420$ nm)                                                                         | 32.5                                   | 23.6         | S5                |
| CdS/MoS <sub>2</sub>                                                       | 100                  | Lactic acid                                            | 300 W Xe lamp<br>( $\lambda > 400$ nm)                                                                         | 13.4                                   | -            | S6                |
| CdS/UT-MoS <sub>2</sub>                                                    | 1                    | Lactic acid                                            | Natural sunlight                                                                                               | 174                                    | 38.7         | S7                |
| CdS/MoS <sub>2</sub> -RGO<br>CdS/MoS <sub>2</sub>                          | 50                   | Lactic acid                                            | 350 W Xe lamp<br>( $\lambda > 420$ nm)                                                                         | 12.426<br>11.026                       | 54.4<br>31.8 | S8                |
| CdS/MoS <sub>2</sub> /RGO                                                  | 200                  | Lactic acid                                            | 300-W Xe ( $\lambda > 420$ nm)                                                                                 | 9.0                                    | 28.1         | S9                |
| CdS/MoS <sub>2</sub> /RGO/CoP                                              | 1                    | Lactic acid                                            | Solar simulator<br>(150 W Xe lamp)                                                                             | 83.907                                 | 22.5         | S10               |

|                                                                            |     |                                                        |                                        |                     |       |     |
|----------------------------------------------------------------------------|-----|--------------------------------------------------------|----------------------------------------|---------------------|-------|-----|
| CdS/MoS <sub>2</sub> /MWCNTs                                               | 20  | Lactic acid                                            | 300 W Xe lamp<br>( $\lambda > 400$ nm) | 0.676               | -     | S11 |
| CdS/MoS <sub>2</sub> /In <sub>2</sub> S <sub>3</sub>                       | 50  | Lactic acid                                            | 300 W Xe lamp<br>( $\lambda > 420$ nm) | 0.6258              | -     | S12 |
| CdS/MoS <sub>2</sub>                                                       | 200 | Lactic acid                                            | 300 W Xe lamp<br>( $\lambda > 420$ nm) | 60.28               | 50.07 | S13 |
| CdS/1T-MoS <sub>2</sub>                                                    | 20  | Lactic acid                                            | 300 W Xe lamp<br>( $\lambda > 420$ nm) | 39.746              | -     | S14 |
| CdS/MoS <sub>2</sub> -TaON                                                 | 200 | Na <sub>2</sub> S<br>+ Na <sub>2</sub> SO <sub>3</sub> | 300 W Xe lamp<br>( $\lambda > 420$ nm) | 3.142               | -     | S15 |
| CdS/MoS <sub>2</sub> /SiW <sub>11</sub> Co                                 | 100 | Lactic acid                                            | 300 W Xe lamp<br>( $\lambda > 420$ nm) | 17.0                | -     | S16 |
| CdS/MoS <sub>2</sub> /<br>SiW <sub>12</sub> @UiO-67                        | 100 | Lactic acid                                            | 300 W Xe lamp<br>( $\lambda > 420$ nm) | 12.7                | -     | S17 |
| CdS/MoS <sub>2</sub><br>CdS/Co-MoS <sub>2</sub><br>CdS/Ni-MoS <sub>2</sub> | 20  | Na <sub>2</sub> S<br>+ Na <sub>2</sub> SO <sub>3</sub> | 300 W Xe lamp<br>( $\lambda > 420$ nm) | 9.7<br>20.9<br>24.0 | 17.3  | S18 |
| CdS/MoS <sub>2</sub>                                                       | 200 | Lactic acid                                            | 300 W Xe lamp<br>( $\lambda > 420$ nm) | 21.4                | 57.2  | S19 |

## References

- [S1] L. Yang, D. Zhong, J. Zhang, Z. Yan, S. Ge, P. Du, J. Jiang, D. Sun, X. Wu, Z. Fan, S. A. Dayeh and B. Xiang, *ACS Nano*, 2014, **8**, 6979–6985.
- [S2] J. He, L. Chen, F. Wang, Y. Liu, P. Chen, C. T. Au and S. F. Yin, *ChemSusChem*, 2016, **9**, 624–630.
- [S3] K. Zhang, W. Kim, M. Ma, X. Shi and J. H. Park, *J. Mater. Chem. A*, 2015, **3**, 4803–4810.
- [S4] X. L. Yin, L. L. Li, W. J. Jiang, Y. Zhang, X. Zhang, L. J. Wan and J. S. Hu, *ACS Appl. Mater. Interfaces*, 2016, **8**, 15258–15266.
- [S5] L. Shen, M. Luo, Y. Liu, R. Liang, F. Jing and L. Wu, *Appl. Catal. B*, 2015, **166–167**, 445–453.
- [S6] M. Liu, F. Li, Z. Sun, L. Ma, L. Xu and Y. Wang, *Chem. Commun.*, 2014, **50**, 11004–11007.
- [S7] D. P. Kumar, S. Hong, D. A. Reddy and T. K. Kim, *J. Mater. Chem. A*, 2016, **4**, 18551–18558.
- [S8] D. Lang, T. Shen and Q. Xiang, *ChemCatChem*, 2015, **7**, 943–951.
- [S9] K. Chang, Z. Mei, T. Wang, Q. Kang, S. Ouyang and J. Ye, *ACS Nano*, 2014, **8**, 7078–7087.
- [S10] D. A. Reddy, J. Choi, S. Lee, Y. Kim, S. Hong, D. P. Kumar and T. K. Kim, *Catal. Sci. Technol.*, 2016, **6**, 6197–6206.
- [S11] W. K. Jo and N. C. S. Selvam, *Appl. Catal. A*, 2016, **525**, 9–22.
- [S12] W. Jiang, Y. Liu, R. Zong, Z. Li, W. Yao and Y. Zhu, *J. Mater. Chem. A*, 2015, **3**, 18406–18412.
- [S13] X. L. Yin, G. Y. He, B. Sun, W. J. Jiang, D. J. Xue, A. D. Xia, L. J. Wan and J. S. Hu, *Nano Energy*, 2016, **28**, 319–329.
- [S14] P. Du, Y. Zhu, J. Zhang, D. Xu, W. Peng, G. Zhang, F. Zhang and X. Fan, *RSC Adv.*, 2016, **6**, 74394–74399.
- [S15] Z. Wang, J. Hou, C. Yang, S. Jiao and H. Zhu, *Chem. Commun.*, 2014, **50**, 1731–1734.
- [S16] M. Liu, F. Li, Z. Sun, L. Xu, Y. Song and A. Munventwali, *RSC Adv.*, 2015, **5**, 47314–47318.
- [S17] Y. Bu, F. Li, Y. Zhang, R. Liu, X. Luo and L. Xu, *RSC Adv.*, 2016, **6**, 40560–40566.

- [S18] X. Ma, J. Li, C. An, J. Feng, Y. Chi, J. Liu, J. Zhang and Y. Sun, *Nano Res.*, 2016, **9**, 2284–2293.
- [S19] X. Hai, K. Chang, H. Pang, M. Li, P. Li, H. Liu, L. Shi and J. Ye, *J. Am. Chem. Soc.*, 2016, **138**, 14962–14969.
